# Supplementary material for: Molecular engineering of dendritic luminogens with thermally activated delayed fluorescence and aggregation-induced emission characteristics for efficient solution-processed non-doped OLEDs
Source: Royal Society of Chemistry journal article supplement (doi:10.1039/d0tc02961k), 2020-01-01
Supplement: d0tc02961k1.pdf [file d0tc02961k1.pdf]

## Supplementary Material

Molecular engineering of dendritic luminogens with thermally activated delayed fluorescence and aggregation-induced emission characteristics for efficient solution-processed nondoped OLEDs

*Fulong Ma<sup>a</sup>, Xinxin Zhao<sup>a</sup>, Hefang Ji<sup>a</sup>, Dongdong Zhang<sup>a</sup>, Kamran Hasrat<sup>a</sup>, Zhengjian Qi<sup>a\*</sup>*

<sup>a</sup>Jiangsu Province Hi-Tech Key Laboratory for Biomedical Research, School of Chemistry and Chemical Engineering, Southeast University, Nanjing, Jiangsu 211189, PR China

\* Corresponding author. E-mail address: qizhengjian@seu.edu.cn (Z. Qi).

## Supporting Information

**General Information.** All experimental materials and solvents were obtained from commercial approach without any further purification if not particularly mentioned.  $^1\text{H}$  NMR and  $^{13}\text{C}$  NMR spectra were performed on a Bruker Advance 600 MHz using DMSO- $d_6$ ,  $\text{CDCl}_3$  and acetone- $d_6$  as solvents at room temperature. Molecular masses were measured on matrix-assisted laser desorption/ionization time-of-flight mass spectrometry (MALDI-TOF-MS) using a BRUKER DALTONICS instrument and a-cyanohydroxycinnamic acid was selected as a matrix. UV-Vis absorption spectra were measured on UV-2600 (Shimadzu Corporation) and photoluminescence emission spectra were obtained from Fluoromax-4 (Horiba Jobin Yvon Inc) spectrophotometer. The solid and solution PL quantum efficiencies of the targeted product were measured using an integrating sphere under nitrogen at room temperature. Thermo gravimetric analysis (TGA) was performed with Netzsch simultaneous thermal analyzer (STA) system (STA409 PC) under a dry nitrogen gas flow at a heating rate of  $10\text{ }^\circ\text{C min}^{-1}$ . Differential scanning calorimetry (DSC) curves were measured using a Netzsch instrument (TA, Netzsch). The particle size distribution was measured by dynamic light scattering (DLS) using a BROOKHAVEN instrument. The film surface morphology was determined by atomic force microscopy (AFM) (Seiko Instruments, SPA-400). X-ray diffraction (XRD) analyses were measured on a BRUKER D8-DISCOVER diffractometer using  $\text{Cu K}\alpha$  radiation. Cyclic voltammogram was performed in  $\text{CH}_2\text{Cl}_2$  solution ( $10^{-3}\text{ M}$ ) with tetrabutylammonium hexafluorophosphate ( $0.1\text{ M}$ ) as supporting electrolyte and ferrocene as the internal standard at a scan rate of  $100\text{ mV s}^{-1}$  on CHI750C voltammetric analyzer. A platinum plate, silver wire and a platinum wire were used as the working, reference and counter electrode, respectively.

**Device Fabrication and Measurements.** Prior to use, the glass substrates were coated with indium tin oxide (ITO) with a sheet resistance of  $15\ \Omega$  per square and then sequentially cleaned in an ultrasonic bath with deionized water, acetone and ethanol for 15 minutes. The ITO layer was produced by magnetron sputtering

technology with a roughness of 9.8 Å. A PEDOT:PSS layer (50 nm) was spin-coated onto the ITO surface and baked at 150 °C for 10 min to remove the residual water. Then, an EML with a thickness of about 40 nm was spin-coated from a filtered 10 mg mL<sup>-1</sup> 1, 2-dichloroethane solution onto the PEDOT: PSS layer and annealed at 80 °C for 30 min to remove the residual solvent under N<sub>2</sub> atmosphere. Then, an electron-transport layer TPBi, a Cs<sub>2</sub>CO<sub>3</sub> layer and an Al layer were deposited consecutively onto the spin-coated film in a vacuum chamber at ~ 4×10<sup>-4</sup> Pa with the deposition rates of 1-2 Å s<sup>-1</sup>, 0.1 Å s<sup>-1</sup>, 6 Å s<sup>-1</sup>, respectively. The emission area was 2×2 mm<sup>-2</sup> controlled through a shadow mask. All the characterizations were measured immediately after manufacture at room temperature in ambient condition without encapsulation. The current density and luminance versus driving voltage curves and electroluminescence spectra were measured by a Keithley 2400s source meter and PR655 spectra colorimeter. External quantum efficiencies of the devices were calculated assuming a Lambertian emission distribution.

#### Calculation of rate constants<sup>1-2</sup>

$$k_{r, S} = \frac{\Phi_p}{\tau_p} \quad (1)$$

$$k_{nr, S} = k_{r, S} \left( \frac{1 - \Phi_{PL}}{\Phi_{PL}} \right) \quad (2)$$

$$k_{ISC} = k_{r, S} \left( \frac{1}{\Phi_p} - \frac{1}{\Phi_{PL}} \right) \quad (3)$$

$$k_{RISC} = \frac{\Phi_{PL}}{k_{r, S} \tau_p \tau_d} \quad (4)$$

$$\Phi_p = \frac{A_1 \tau_p}{A_1 \tau_p + A_2 \tau_d} \Phi_{PL} \quad (5)$$

$$\Phi_d = \frac{A_2 \tau_d}{A_1 \tau_p + A_2 \tau_d} \Phi_{PL} \quad (6)$$

The rate constants were calculated according to above equation (1)-(6): Where  $\tau_p$  and

$\tau_d$  were the lifetimes of the prompt and delayed decay components, respectively.  $\Phi_{PL}$  and  $\Phi_P$  were the total PL quantum yield, prompt fluorescence and delayed fluorescence quantum yield, respectively.  $k_r, s, k_{nr, s}, k_{ISC}$  and  $k_{RISC}$  were the rate constant for fluorescence radiative transition, non-radiative transition, intersystem crossing (ISC) and reverse intersystem crossing (RISC) processes, respectively.  $A_1$  and  $A_2$  were the frequency factors according to the following fitting model of transient PL decay curves :  $I(t) = A_1 \exp\left(-\frac{t}{\tau_p}\right) + A_2 \exp\left(-\frac{t}{\tau_d}\right)$ .

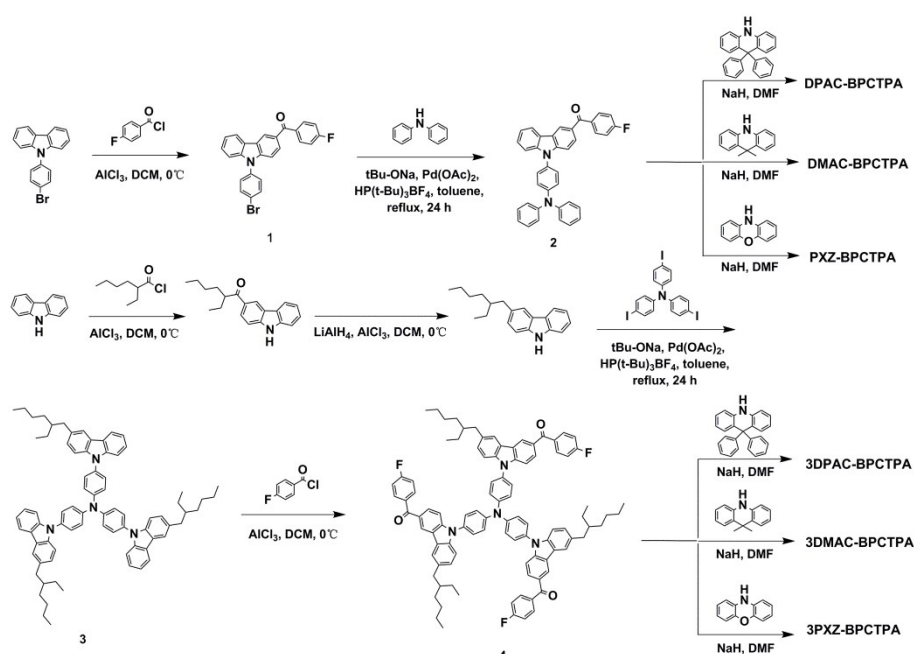

**Scheme S1.** The synthetic routes of these emitters.

**Synthesis of (9-(4-bromophenyl)-9H-carbazol-3-yl)(4-fluorophenyl)methanone (1).** To a solution of 9-(4-bromophenyl)-9H-carbazole (5 g, 15.5 mmol) and aluminium chloride (2.07 g, 15.5 mmol) in 50 mL dry dichloromethane at 0 °C, 4-fluorobenzoyl chloride (2.95 mg, 18.6 mmol) was added dropwise. After the addition was completed, the mixture was stirred at room temperature for 12 h. The reaction was quenched by adding 40 mL ice-HCl solution, and the aqueous layer was

separated from the organic layer. Then the aquatic phase was further extracted with dichloromethane for several times. The combined organic solution was evaporated under vacuo to afford intermediate products. The solvent was removed under reduced pressure and the residue was purified on a silica gel column using petroleum ether/dichloromethane mixture (4:1, v/v) as eluent to afford the product as white powder in 91% yield. <sup>1</sup>H NMR (600 MHz, DMSO-d<sub>6</sub>) δ [ppm]: 8.71 (d, J = 1.4 Hz, 1H), 8.39 (d, J = 7.7 Hz, 1H), 7.92-7.85 (m, 5H), 7.67-7.65 (m, 2H), 7.51 (ddd, J = 13.7, 7.7, 3.8 Hz, 2H), 7.45-7.41 (m, 3H), 7.38-7.35 (m, 1H). <sup>13</sup>C NMR (150 MHz, DMSO-d<sub>6</sub>) δ [ppm]: 194.51, 165.69, 164.03, 142.92, 141.36, 135.97, 135.20, 135.19, 133.79, 132.92, 132.86, 129.76, 129.58, 128.95, 127.72, 123.89, 123.30, 123.10, 121.75, 121.65, 121.52, 116.12, 115.97, 110.55, 110.07. MS (MALDI-TOF) [m/z]: calcd for C<sub>25</sub>H<sub>15</sub>BrFNO, 443.03; found, 443.040.

**Synthesis of (9-(4-(diphenylamino)phenyl)-9H-carbazol-3-yl)(4-fluorophenyl)methanone (2).** 2 (4 g, 9 mmol), diphenylamine (1.98 g, 11.7 mmol), Pd(OAc)<sub>2</sub> (51.6 mg, 0.23 mmol), HP(t-Bu)<sub>3</sub>BF<sub>4</sub> (66.7 mg, 0.23 mmol), t-BuONa (1.69 g, 17.55 mmol) were dissolved in 30 mL toluene and refluxed for 24 h under nitrogen. After cooled, the mixture was extracted with dichloromethane and washed with brine for three times. After dried over anhydrous Na<sub>2</sub>SO<sub>4</sub>, the solvent was removed under reduced pressure and the residue was purified with column chromatography on silica gel using petroleum ether/dichloromethane mixture (3:1, v/v) as the eluent to afford the product as white powder in 87% yield. <sup>1</sup>H NMR (600 MHz, DMSO-d<sub>6</sub>) δ [ppm]: 8.69 (d, J = 1.4 Hz, 1H), 8.37 (d, J = 7.8 Hz, 1H), 7.91-7.86 (m, 3H), 7.56-7.49 (m, 4H), 7.41 (ddd, J = 15.9, 8.3, 4.2 Hz, 7H), 7.34 (dd, J = 11.3, 4.3 Hz, 1H), 7.23-7.17 (m, 6H), 7.14 (t, J = 7.4 Hz, 2H). <sup>13</sup>C NMR (150 MHz, DMSO-d<sub>6</sub>) δ [ppm]: 194.49, 147.62, 147.30, 143.31, 141.79, 135.29, 135.27, 132.90, 132.8, 130.26, 130.02, 129.36, 128.77, 128.39, 127.53, 125.21, 124.30, 123.92, 123.59, 123.07, 122.78, 121.61, 121.30, 116.07, 115.93, 110.69, 110.13. MS (MALDI-TOF)

[m/z]: calcd for C<sub>37</sub>H<sub>25</sub>FN<sub>2</sub>O, 532.20; found, 532.246.

**Synthesis of tris(4-(3-(2-ethylhexyl)-9H-carbazol-9-yl)phenyl)amine (3).** tris(4-iodophenyl)amine (4 g, 6.13 mmol), 3-(2-ethylhexyl)-9H-carbazole (6.85 g, 24.52 mmol), Pd(OAc)<sub>2</sub> (110 mg, 0.49 mmol), HP(t-Bu)<sub>3</sub>BF<sub>4</sub> (142.2 mg, 0.49 mmol), t-BuONa (3.53 g, 36.78 mmol) were dissolved in 60 mL toluene and refluxed for 24 h under nitrogen. After cooled, the mixture was extracted with dichloromethane and washed with brine for three times. After dried over anhydrous Na<sub>2</sub>SO<sub>4</sub>, the solvent was removed under reduced pressure and the residue was purified with column chromatography on silica gel using petroleum ether/dichloromethane mixture (3:1, v/v) as the eluent to afford the product as white powder in 83% yield. <sup>1</sup>H NMR (600 MHz, DMSO-d<sub>6</sub>) δ [ppm]: 8.23 (d, J = 7.6 Hz, 3H), 8.02 (s, 3H), 7.67 (d, J = 8.4 Hz, 6H), 7.55 (d, J = 8.5 Hz, 6H), 7.50-7.36 (m, 9H), 7.33-7.23 (m, 6H), 2.70 (d, J = 6.8 Hz, 6H), 1.69-1.64 (m, 3H), 1.45-1.20 (m, 24H), 0.87 (dt, J = 18.5, 7.0 Hz, 18H). <sup>13</sup>C NMR (150 MHz, CDCl<sub>3</sub>) δ [ppm]: 141.11, 139.41, 133.54, 133.07, 128.07, 127.44, 125.71, 125.33, 123.34, 123.31, 120.47, 120.26, 119.72, 109.77, 109.35, 41.71, 40.15, 32.36, 28.93, 25.42, 23.11, 14.19, 10.87. MS (MALDI-TOF) [m/z]: calcd for C<sub>78</sub>H<sub>84</sub>N<sub>4</sub>, 1076.67; found, 1076.679.

**Synthesis of ((nitrilotris(benzene-4,1-diyl))tris(6-(2-ethylhexyl)-9H-carbazole-9,3-diyl))tris((4-fluorophenyl)methanone) (4).** The synthetic process of 4 was similar to that for 1 as green powder with a yield of 90%. <sup>1</sup>H NMR (600 MHz, DMSO-d<sub>6</sub>) δ [ppm]: 8.68 (d, J = 1.5 Hz, 3H), 8.18 (s, 3H), 7.89 (ddd, J = 12.9, 7.2, 1.8 Hz, 9H), 7.72 (d, J = 8.7 Hz, 6H), 7.58 (t, J = 8.5 Hz, 9H), 7.48-7.37 (m, 9H), 7.33 (dd, J = 9.8, 1.4 Hz, 3H), 2.69 (d, J = 6.9 Hz, 6H), 1.67 (dt, J = 12.2, 6.1 Hz, 3H), 1.35-1.19 (m, 24H), 0.85 (dt, J = 15.4, 7.2 Hz, 18H). <sup>13</sup>C NMR (150 MHz, CDCl<sub>3</sub>) δ [ppm]: 195.17, 165.88, 164.21, 146.64, 143.56, 140.20, 135.07, 135.05, 134.86, 132.52, 132.46, 132.39, 129.29, 128.34, 128.23, 125.48, 115.43, 115.29, 109.82, 41.68, 40.12, 32.30,

28.88, 25.36, 23.10, 14.18, 10.84. MS (MALDI-TOF) [m/z]: calcd for C<sub>99</sub>H<sub>93</sub> F<sub>3</sub>N<sub>4</sub>O<sub>3</sub>, 1443.72; found, 1443.724.

**Synthesis of (4-(9,9-diphenylacridin-10(9H)-yl)phenyl)(9-(4-(diphenylamino)phenyl)-9H-carbazol-3-yl)methanone (DPAC-BPCTPA).** 9,9-diphenyl-9,10-dihydroacridine (406.78 mg, 1.22 mmol) was dissolved in 15 mL dry dimethylformamide (DMF) and t-BuOK (210.95 mg, 1.88 mmol) was added under nitrogen atmosphere. The mixture was stirred at room temperature for 30 minutes. Then, **2** (500 mg, 0.94 mmol) was dissolved in 5 mL dry dimethylformamide (DMF) and added to the mixture dropwise. After the addition was completed, the mixture was stirred at 110 °C for 12 h. After cooling to room temperature, the resulting mixture was poured into water and extracted with ethyl acetate for three times. The combined organic solution were washed with brine three times. After dried over anhydrous MgSO<sub>4</sub>, the solvent was removed under reduced pressure and the residue was purified with column chromatography on silica gel using petroleum ether/dichloromethane mixture (2:1, v/v) as the eluent to afford the product as green powder in 87% yield. <sup>1</sup>H NMR (600 MHz, DMSO-d<sub>6</sub>) δ [ppm]: 8.81 (d, J = 1.5 Hz, 1H), 8.41 (d, J = 7.8 Hz, 1H), 8.02 (d, J = 8.3 Hz, 2H), 7.98 (dd, J = 8.6, 1.7 Hz, 1H), 7.57-7.50 (m, 4H), 7.44 (d, J = 8.2 Hz, 1H), 7.41-7.38 (m, 4H), 7.37-7.31 (m, 5H), 7.28 (t, J = 7.6 Hz, 4H), 7.22-7.18 (m, 6H), 7.17-7.12 (m, 4H), 6.95 (ddd, J = 11.8, 8.3, 4.1 Hz, 6H), 6.81 (dd, J = 7.8, 1.4 Hz, 2H), 6.51 (dd, J = 8.2, 0.7 Hz, 2H). <sup>13</sup>C NMR (150 MHz, DMSO-d<sub>6</sub>) δ [ppm]: 195.02, 147.64, 147.31, 146.43, 141.82, 141.70, 132.63, 131.13, 130.27, 130.09, 130.02, 129.70, 128.42, 128.33, 127.74, 127.57, 127.02, 125.22, 124.31, 123.60, 121.12, 114.70. MS (MALDI-TOF) [m/z]: calcd for C<sub>62</sub>H<sub>43</sub>N<sub>3</sub>O, 845.34; found, 846.332. Melting point: 174.3°. Anal. Calcd for C<sub>62</sub>H<sub>43</sub>N<sub>3</sub>O: C, 88.02; H, 5.12; N, 4.97; O, 1.89. Found: C, 88.10; H, 5.04; N, 5.06.

**Synthesis of (4-(9,9-dimethylacridin-10(9H)-yl)phenyl)(9-(4-**

**(diphenylamino)phenyl)-9H-carbazol-3-yl)methanone (DMAC-BPCTPA).**

The synthetic process of DMAC-BPCTPA was similar to that for DPAC-BPCTPA as green powder with a yield of 88%. <sup>1</sup>H NMR (600 MHz, DMSO-d<sub>6</sub>) δ [ppm]: 8.85 (d, J = 1.6 Hz, 1H), 8.42 (d, J = 7.8 Hz, 1H), 8.09 (d, J = 8.3 Hz, 2H), 8.01 (dd, J = 8.6, 1.6 Hz, 1H), 7.62-7.50 (m, 9H), 7.45 (d, J = 8.2 Hz, 1H), 7.42-7.36 (m, 5H), 7.20 (dd, J = 10.7, 8.2 Hz, 6H), 7.14 (t, J = 7.4 Hz, 2H), 7.07-7.03 (m, 2H), 6.34 (dd, J = 8.2, 0.8 Hz, 2H), 1.65 (s, 6H). <sup>13</sup>C NMR (150 MHz, DMSO-d<sub>6</sub>) δ [ppm]: 195.10, 147.64, 147.32, 140.53, 132.88, 131.25, 130.60, 130.28, 130.04, 128.43, 127.05, 125.92, 125.22, 124.31, 123.62, 121.73, 121.42, 121.33, 114.56, 36.14, 31.56. MS (MALDI-TOF) [m/z]: calcd for C<sub>52</sub>H<sub>39</sub>N<sub>3</sub>O, 721.31; found, 722.300. Melting point: 155.6°. Anal. Calcd for C<sub>52</sub>H<sub>39</sub>N<sub>3</sub>O: C, 86.52; H, 5.45; N, 5.82; O, 2.22. Found: C, 86.50; H, 5.51; N, 5.87.

**Synthesis of (4-(10H-phenoxazin-10-yl)phenyl)(9-(4-(diphenylamino)phenyl)-9H-carbazol-3-yl)methanone (PXZ-BPCTPA).**

The synthetic process of PXZ-BPCTPA was similar to that for DPAC-BPCTPA as yellow powder with a yield of 82%. <sup>1</sup>H NMR (600 MHz, CDCl<sub>3</sub>) δ [ppm]: 8.73 (d, J = 1.5 Hz, 1H), 8.20 (d, J = 7.8 Hz, 1H), 8.09 (d, J = 8.2 Hz, 2H), 8.01 (dd, J = 8.6, 1.7 Hz, 1H), 7.53-7.47 (m, 5H), 7.41-7.38 (m, 2H), 7.36-7.31 (m, 5H), 7.29-7.27 (m, 2H), 7.24-7.21 (m, 4H), 7.11 (t, J = 7.3 Hz, 2H), 6.73 (dd, J = 7.7, 1.5 Hz, 2H), 6.71-6.63 (m, 4H), 6.05 (d, J = 7.8 Hz, 2H). <sup>13</sup>C NMR (150 MHz, CDCl<sub>3</sub>) δ [ppm]: 195.49, 147.82, 147.33, 144.01, 143.82, 142.27, 142.04, 138.85, 133.88, 132.68, 130.73, 130.08, 129.55, 128.89, 128.66, 127.81, 126.82, 125.01, 123.78, 123.71, 123.56, 123.30, 123.22, 123.02, 121.76, 120.87, 120.70, 115.64, 113.39, 110.45, 109.63. MS (MALDI-TOF) [m/z]: calcd for C<sub>49</sub>H<sub>33</sub>N<sub>3</sub>O<sub>2</sub>, 695.26; found, 696.250. Melting point: 183.4°. Anal. Calcd for C<sub>49</sub>H<sub>33</sub>N<sub>3</sub>O<sub>2</sub>: C, 84.58; H, 4.78; N, 6.04; O, 4.60. Found: C, 84.51; H, 4.82; N, 6.11.



**Synthesis of ((nitrilotris(benzene-4,1-diyl))tris(6-((S)-2-ethylhexyl)-9H-carbazole-9,3-diyl))tris((4-(9,9-diphenylacridin-10(9H)-yl)phenyl)methanone) (3DPAC-BPCTPA).**

9,9-diphenyl-9,10-dihydroacridine (733.55 mg, 2.2 mmol) was dissolved in 15 mL dry dimethylformamide (DMF) and t-BuOK (123.3 mg, 1.1 mmol) was added under nitrogen atmosphere. The mixture was stirred at room temperature for 30 minutes. Then, 4 (800 mg, 0.55 mmol) was dissolved in 10 mL dry dimethylformamide (DMF) and added to the mixture dropwise. After the addition was completed, the mixture was stirred at 110 °C for 12 h. After cooling to room temperature, the resulting mixture was poured into water and extracted with ethyl acetate for three times. The combined organic solution was washed with brine three times. After dried over anhydrous MgSO<sub>4</sub>, the solvent was removed under reduced pressure and the residue was purified with column chromatography on silica gel using petroleum ether/dichloromethane mixture (2:1, v/v) as the eluent to afford the product as green powder in 74% yield.

<sup>1</sup>H NMR (600 MHz, Acetone-d<sub>6</sub>) δ [ppm]: 8.69 (d, J = 1.5 Hz, 3H), 8.04 (s, 3H), 7.96 (d, J = 8.3 Hz, 6H), 7.91 (dd, J = 8.6, 1.6 Hz, 3H), 7.64 (d, J = 8.8 Hz, 6H), 7.59 (d, J = 8.8 Hz, 6H), 7.49 (d, J = 8.6 Hz, 3H), 7.35 (d, J = 8.4 Hz, 3H), 7.27 (dd, J = 8.4, 1.4 Hz, 3H), 7.23-7.12 (m, 24H), 7.04-7.00 (m, 6H), 6.89-6.85 (m, 9H), 6.84-6.81 (m, 6H), 6.76 (dd, J = 7.8, 1.5 Hz, 6H), 6.46 (dd, J = 8.2, 0.9 Hz, 6H), 2.66-2.66 (m, 6H), 1.60 (s, 3H), 1.16 (t, J = 9.2 Hz, 25H), 0.74 (td, J = 7.1, 4.0 Hz, 18H). <sup>13</sup>C NMR (150 MHz, CDCl<sub>3</sub>) δ [ppm]: 195.61, 146.68, 146.27, 144.22, 143.71, 141.88, 140.26, 138.47, 134.94, 132.41, 132.19, 131.02, 130.39, 130.17, 130.12, 129.12, 128.57, 128.38, 128.27, 127.67, 126.92, 126.36, 125.50, 123.82, 123.41, 123.15, 120.94, 120.59, 114.24, 109.84, 109.45, 56.82, 41.68, 40.16, 32.33, 28.89, 25.40, 23.10, 14.18, 10.86. MS (MALDI-TOF) [m/z]: calcd for C<sub>174</sub>H<sub>147</sub>N<sub>7</sub>O<sub>3</sub>, 2383.16; found, 2384.073. Melting point: 191.4°. Anal. Calcd for C<sub>174</sub>H<sub>147</sub>N<sub>7</sub>O<sub>3</sub>: C, 87.66; H, 6.22; N, 4.11; O, 2.01. Found: C, 87.59; H, 6.27; N, 4.06.

**Synthesis of ((nitrilotris(benzene-4,1-diyl))tris(6-((S)-2-ethylhexyl)-9H-carbazole-9,3-diyl))tris((4-(9,9-dimethylacridin-10(9H)-yl)phenyl)methanone) (3DMAC-BPCTPA).**

The synthetic process of 3DMAC-BPCTPA was similar to that for 3DPAC-BPCTPA as green powder with a yield of 77%. <sup>1</sup>H NMR (600 MHz, CDCl<sub>3</sub>) δ [ppm]: 8.78 (d, J = 1.3 Hz, 3H), 8.14 (d, J = 8.2 Hz, 6H), 8.06 (dd, J = 8.7, 1.5 Hz, 3H), 8.00 (s, 3H), 7.63 (d, J = 8.7 Hz, 6H), 7.58 (dd, J = 8.6, 1.8 Hz, 9H), 7.52 (d, J = 8.2 Hz, 6H), 7.51-7.47 (m, 6H), 7.45 (d, J = 8.3 Hz, 3H), 7.32 (dd, J = 8.4, 1.0 Hz, 3H), 7.06-7.01 (m, 6H), 6.97 (t, J = 7.4 Hz, 6H), 6.40 (d, J = 8.1 Hz, 6H), 2.80-2.72 (m, 6H), 1.74-1.66 (m, 21H), 1.37-1.28 (m, 24H), 0.93-0.87 (m, 19H). <sup>13</sup>C NMR (150 MHz, CDCl<sub>3</sub>) δ [ppm]: 195.64, 146.70, 144.73, 143.75, 140.58, 138.46, 134.95, 132.58, 132.42, 131.03, 130.49, 129.15, 128.64, 128.41, 128.29, 126.42, 125.51, 125.36, 123.82, 123.43, 123.22, 121.02, 114.27, 109.86, 109.45, 41.69, 40.17, 36.07, 32.34, 31.14, 28.90, 25.40, 23.10, 14.18, 10.86. MS (MALDI-TOF) [m/z]: calcd for C<sub>144</sub>H<sub>135</sub>N<sub>7</sub>O<sub>3</sub>, 2011.07; found, 2011.983. Melting point: 164.6°. Anal. Calcd for C<sub>144</sub>H<sub>135</sub>N<sub>7</sub>O<sub>3</sub>: C, 85.98; H, 6.76; N, 4.87; O, 2.39. Found: C, 85.91; H, 6.81; N, 4.80.

**Synthesis of ((nitrilotris(benzene-4,1-diyl))tris(6-((S)-2-ethylhexyl)-9H-carbazole-9,3-diyl))tris((4-(10H-phenoxazin-10-yl)phenyl)methanone) (3PXZ-BPCTPA)**

The synthetic process of 3PXZ-BPCTPA was similar to that for 3DPAC-BPCTPA as yellow powder with a yield of 71%. <sup>1</sup>H NMR (600 MHz, CDCl<sub>3</sub>) δ [ppm]: 8.75 (d, J = 1.1 Hz, 3H), 8.11 (d, J = 7.9 Hz, 6H), 8.04-7.97 (m, 6H), 7.63 (d, J = 8.7 Hz, 6H), 7.60-7.54 (m, 9H), 7.52 (d, J = 8.1 Hz, 6H), 7.45 (d, J = 8.3 Hz, 3H), 7.32 (dd, J = 8.4, 1.2 Hz, 3H), 6.76-6.58 (m, 18H), 6.05 (d, J = 6.6 Hz, 6H), 2.80-2.71 (m, 6H), 1.68 (dd, J = 11.8, 5.8 Hz, 3H), 1.37-1.27 (m, 24H), 0.90 (dt, J = 18.8, 7.2 Hz, 18H). <sup>13</sup>C NMR (150 MHz, CDCl<sub>3</sub>) δ [ppm]: 195.44, 146.69, 144.08, 143.75, 140.26, 138.79, 134.97, 133.73, 132.70, 132.37, 130.85, 128.99, 128.99, 128.61, 128.43, 128.27, 125.50, 123.78, 123.39, 123.39, 123.24, 123.22, 121.90, 120.93, 115.65, 113.39, 109.86,

109.44, 99.97, 41.68, 40.14, 32.31, 28.89, 25.38, 23.10, 14.19, 10.82. MS (MALDI-TOF) [m/z]: calcd for  $C_{135}H_{117}N_7O_6$ , 1932.91; found, 1932.882. Melting point: 187.5°. Anal. Calcd for  $C_{135}H_{117}N_7O_6$ : C, 83.86; H, 6.10; N, 5.07; O, 4.96. Found: C, 83.79; H, 6.19; N, 4.55.

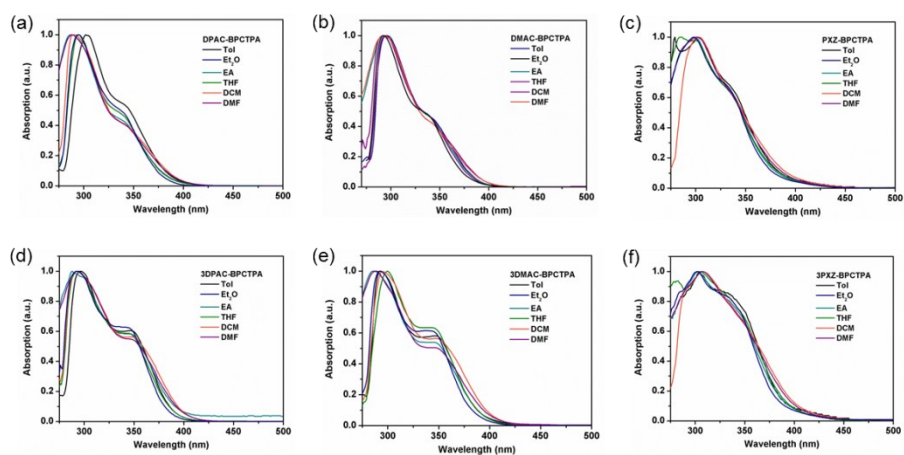

**Figure S1.** The UV-vis absorption spectra of DPAC-BPCTPA (a), DMAC-BPCTPA (b), 3PXZ-BPCTPA (c), 3DPAC-BPCTPA (d), 3DMAC-BPCTPA (e) and 3PXZ-BPCTPA (f) in various solvents at room temperature.

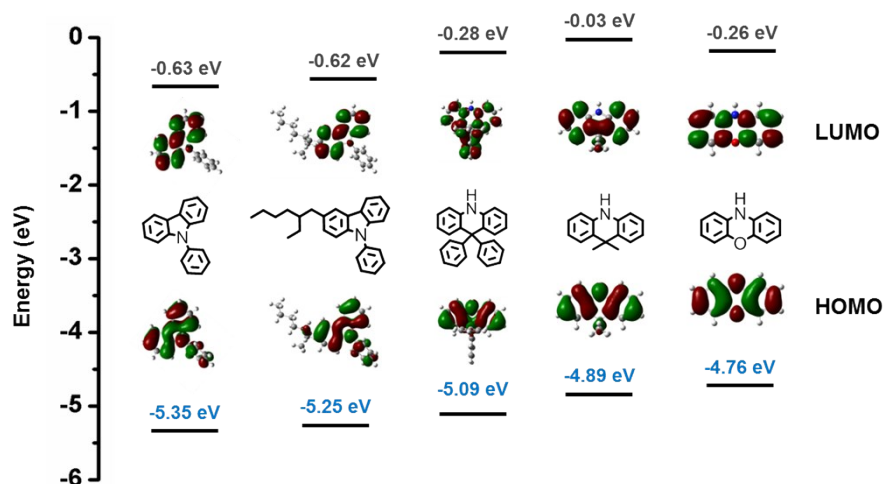

**Figure S2.** The molecular simulation results of 9-phenyl-9H-carbazole, 3-(2-ethylhexyl)-9-phenyl-9H-carbazole, DPAC, DMAC and PXZ units using the B3LYP functional and 6-31G (d) basis set.

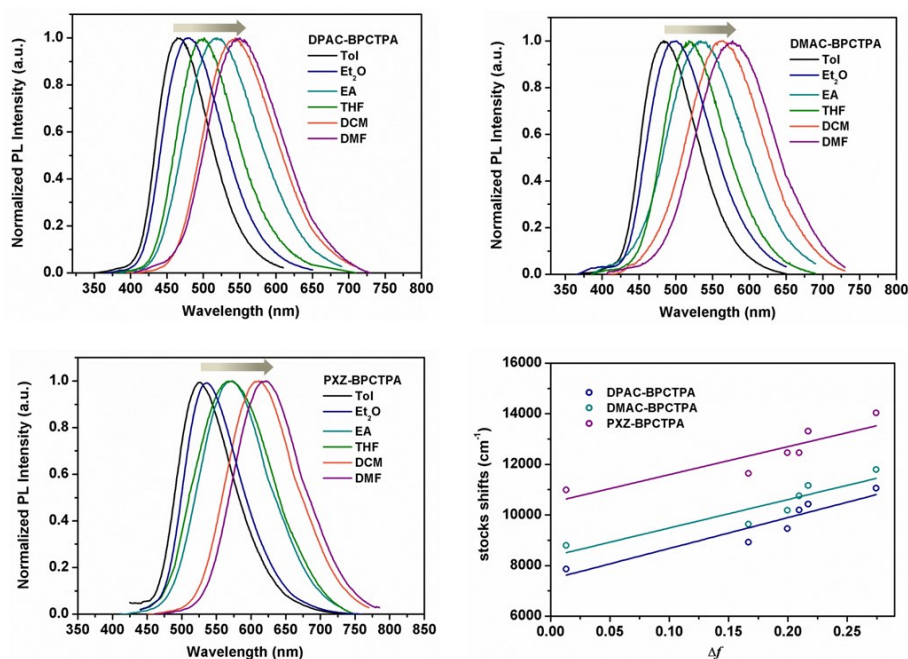

**Figure S3.** PL spectra of DPAC-BPCTPA (a), DMAC-BPCTPA (b) and 3PXZ-BPCTPA (c) in various solvents at room temperature. (d) Plot of Stokes shift versus orientation polarization ( $\Delta f$ ) of the solvents.

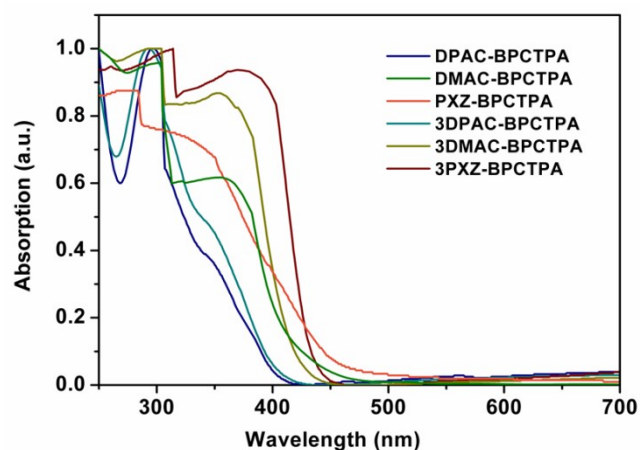

**Figure S4.** The UV-vis absorption spectra measured in neat films at room temperature.

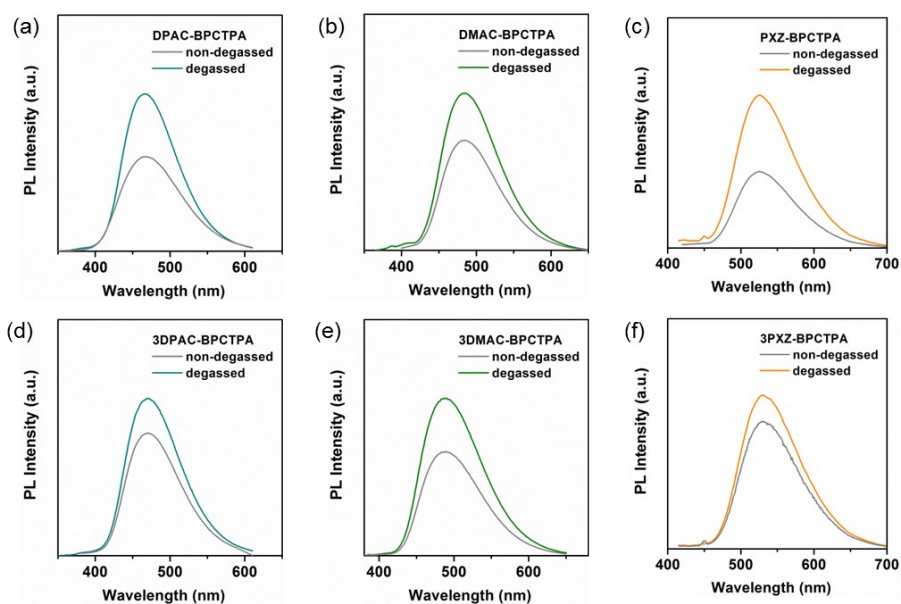

**Figure S5.** The PL spectra of DPAC-BPCTPA (a), DMAC-BPCTPA (b), PXZ-BPCTPA (c), 3DPAC-BPCTPA (d), 3DMAC-BPCTPA (e) and 3PXZ-BPCTPA (f) in non-degassed and degassed toluene solution ( $10^{-5}$  M).

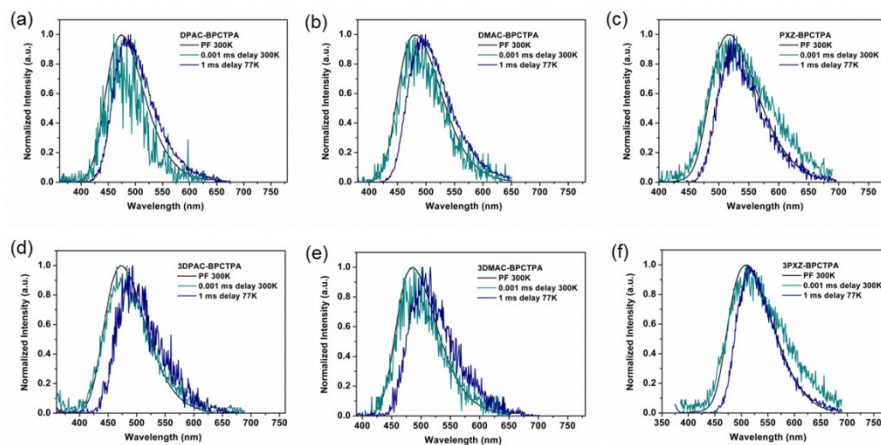

**Figure S6.** PF, DF and PH spectra of DPAC-BPCTPA (a), DMAC-BPCTPA (b), PXZ-BPCTPA (c), 3DPAC-BPCTPA (d), 3DMAC-BPCTPA (e) and 3PXZ-BPCTPA (f) in 20 wt% mCP films performed at 300 K and 77 K.

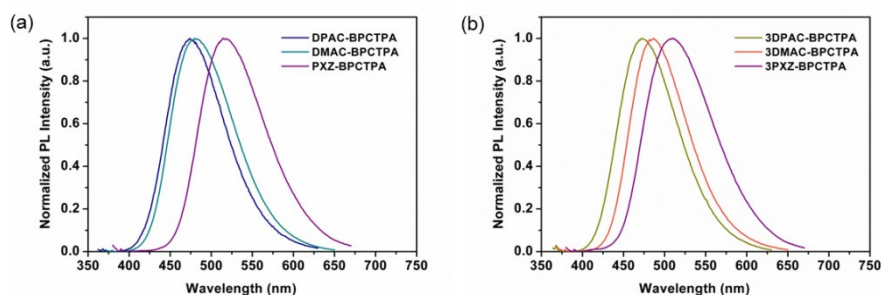

**Figure S7.** (a) The PL spectra of DPAC-BPCTPA, DMAC-BPCTPA and PXZ-BPCTPA in 20 wt% mCP films at room temperature. (b) The PL spectra of 3DPAC-BPCTPA, 3DMAC-BPCTPA and 3PXZ-BPCTPA in 20 wt% mCP films at room temperature.



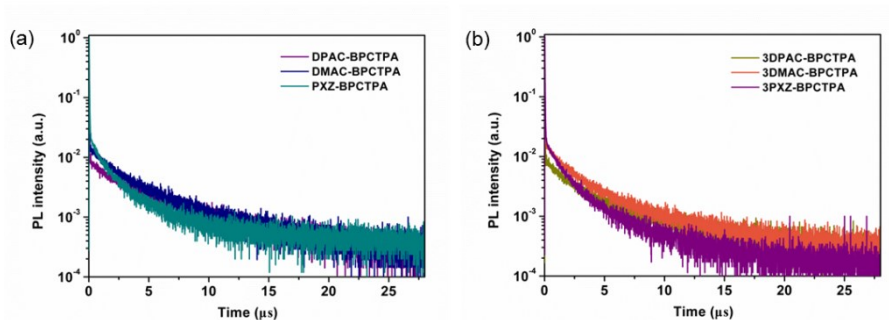

**Figure S8.** (a) The room-temperature fluorescence decay curves of DPAC-BPCTPA, DMAC-BPCTPA and PXZ-BPCTPA in 20 wt% mCP films under  $N_2$  atmosphere. (b) The room-temperature fluorescence decay curves of 3DPAC-BPCTPA, 3DMAC-BPCTPA and 3PXZ-BPCTPA in 20 wt% mCP films under  $N_2$  atmosphere.

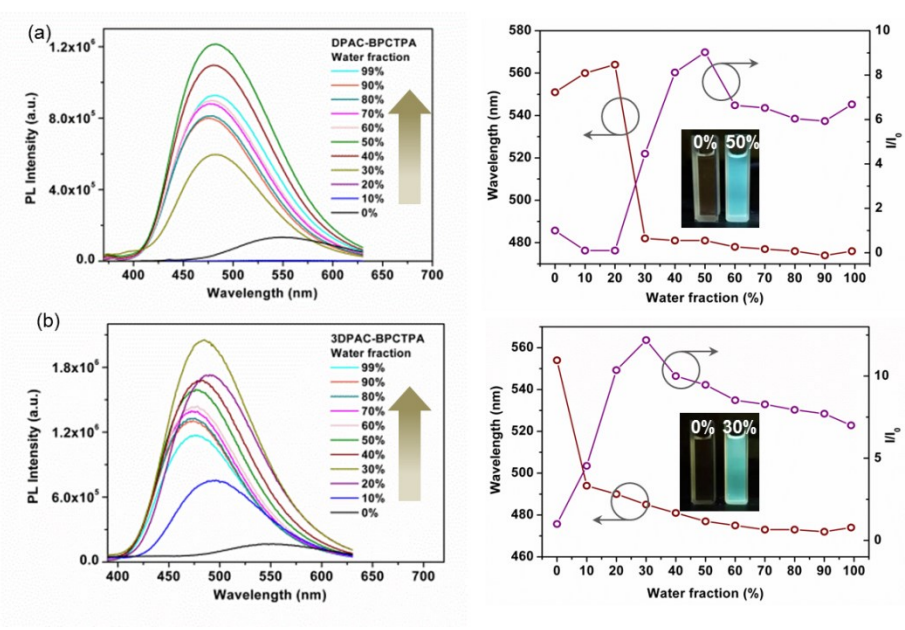

**Figure S9.** PL spectra of DPAC-BPCTPA (a) and 3DPAC-BPCTPA (c) in DMF/water mixtures at different water fractions. Plots of water fractions versus emission maximum wavelength and  $I/I_0$  values of DPAC-BPCTPA (b) and 3DPAC-BPCTPA (d).  $I_0$  is the PL intensity in pure DMF solution. Inset: photos of the emitters in corresponding DMF/water mixtures under 365 nm excitation.

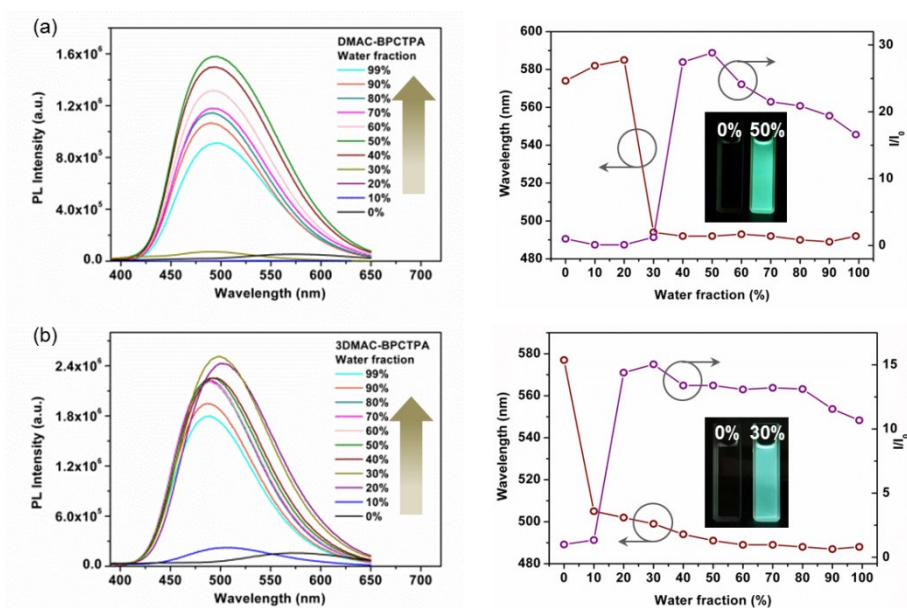

**Figure S10.** PL spectra of DMAC-BPCTPA (a) and 3DMAC-BPCTPA (c) in DMF/water mixtures at different water fractions. Plots of water fractions versus emission maximum wavelength and  $I/I_0$  values of DMAC-BPCTPA (b) and 3DMAC-BPCTPA (d).  $I_0$  is the PL intensity in pure DMF solution. Inset: photos of the emitters in corresponding DMF/water mixtures under 365 nm excitation.

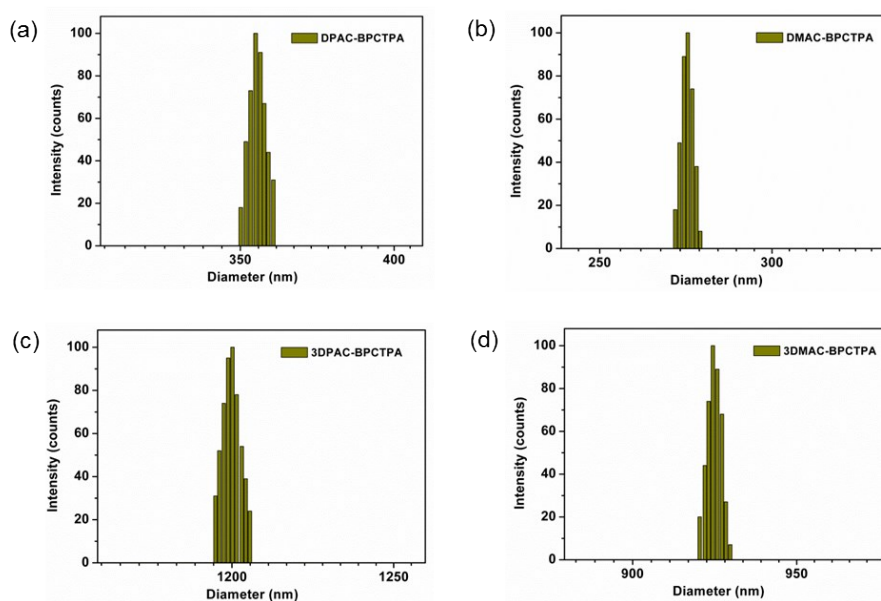

**Figure S11.** The particle size distributions of DPAC-BPCTPA (a), DMAC-BPCTPA



(a), 3DPAC-BPCTPA (c) and 3PXZ-BPCTPA (d) formed in the mixed solvent with 50% water fraction.

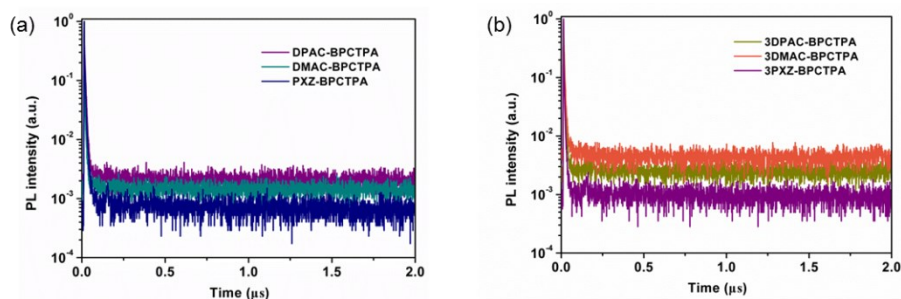

**Figure S12.** The transient PL decay spectra of DPAC-BPCTPA, DMAC-BPCTPA and PXZ-BPCTPA (a), 3DPAC-BPCTPA, 3DMAC-BPCTPA and 3PXZ-BPCTPA (b) in DMF solutions under  $N_2$  atmosphere after  $N_2$  bubbling at room temperature.

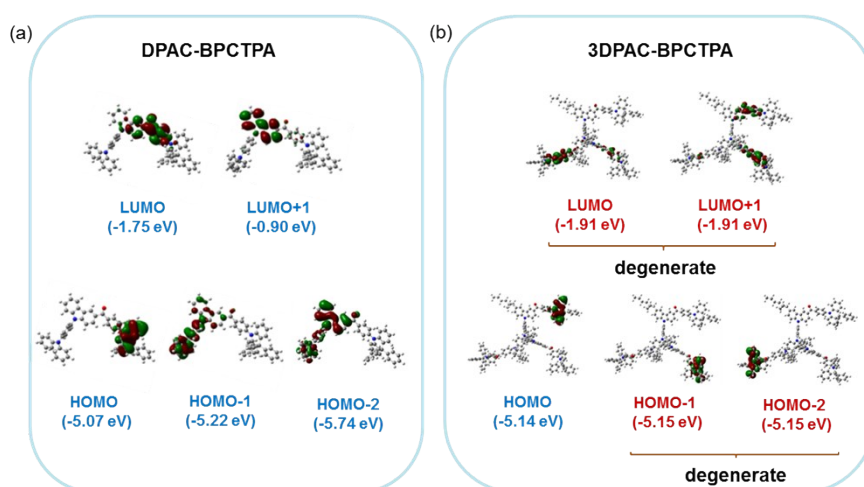

**Figure S13.** Frontier molecular orbitals distribution of DPAC-BPCTPA (a) and 3DPAC-BPCTPA (b).

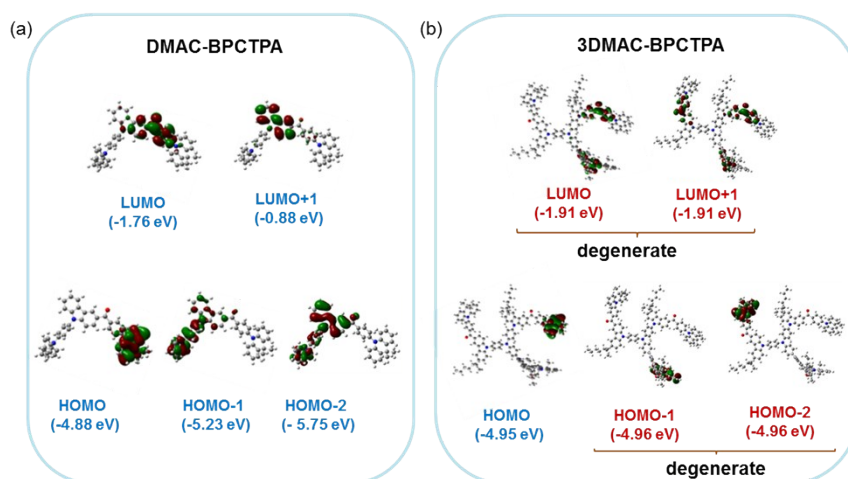

**Figure S14.** Frontier molecular orbitals distribution of DMAC-BPCTPA (a) and 3DMAC-BPCTPA (b).

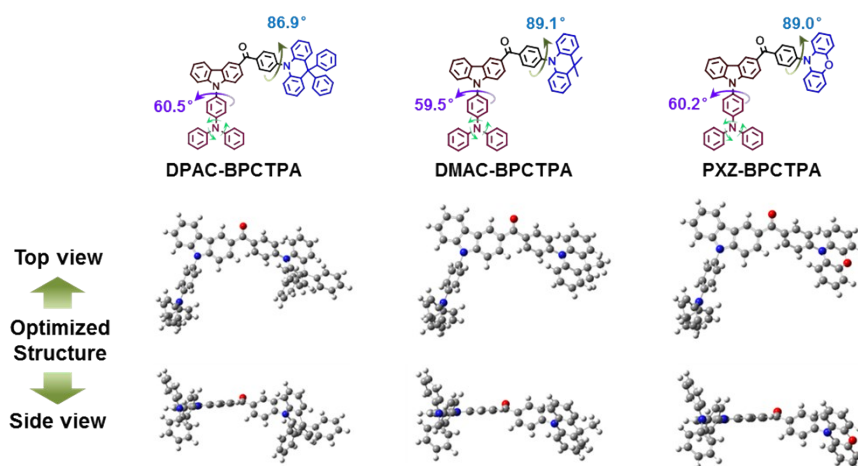

**Figure S15.** The optimized structures with twisted angles of DPAC-BPCTPA, DMAC-BPCTPA and PXZ-BPCTPA.

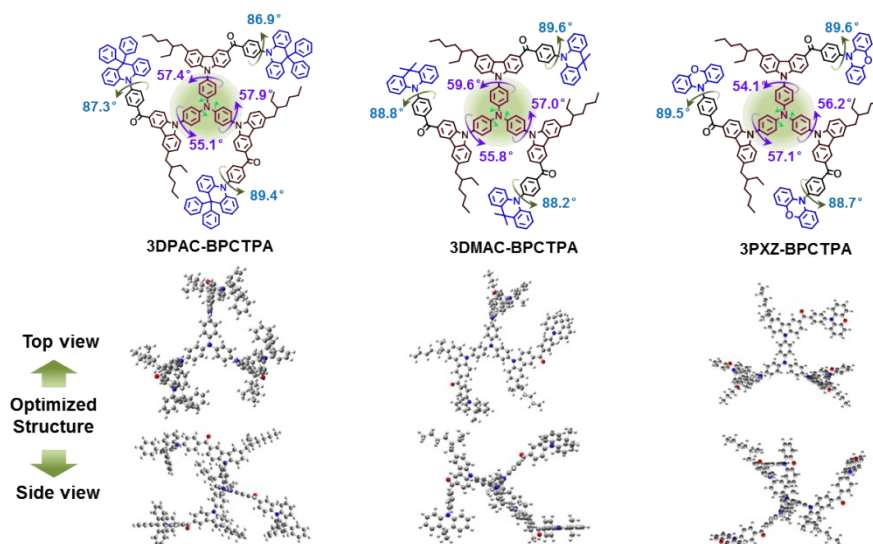

**Figure S16.** The optimized structures with twisted angles of 3DPAC-BPCTPA, 3DMAC-BPCTPA and 3PXZ-BPCTPA.

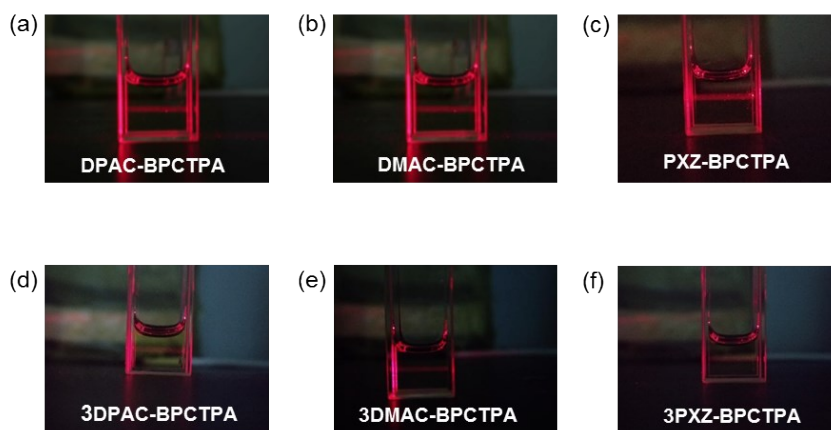

**Figure S17.** The photographs of Tyndall measurement in 1, 2-dichloroethane solution of DPAC-BPCTPA (a), DMAC-BPCTPA(b), PXZ-BPCTPA (c), 3DPAC-BPCTPA (d), 3DMAC-BPCTPA(e), 3PXZ-BPCTPA (f).

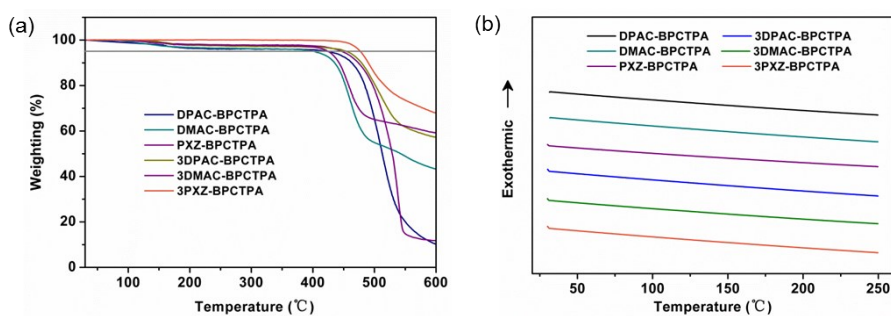

**Figure S18.** TGA(a) and DSC (b) curves of these emitters at a heating rate of  $10^{\circ}\text{C min}^{-1}$  under nitrogen.

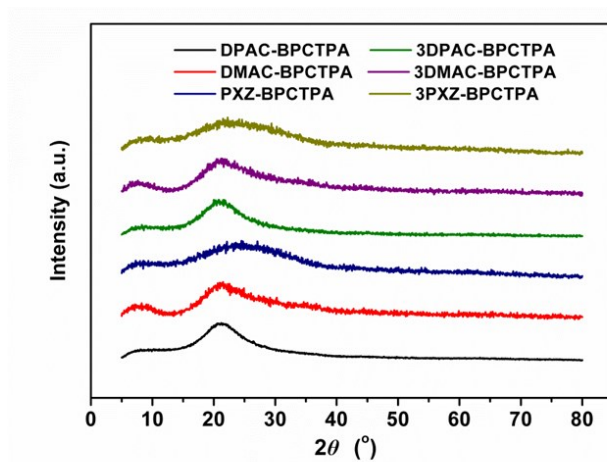

**Figure S19.** The XRD curves of these emitters in solution-processed neat films.

**Table S1.** Photophysical properties of these compounds in 20 wt% mCP films.

| Compound     | $\lambda_{em}^a$ [nm] | $S_1^b$ [eV] | $T_1^c$ [eV] | $\Delta E_{ST}^d$ [eV] |
|--------------|-----------------------|--------------|--------------|------------------------|
| DPAC-BPCTPA  | 474                   | 2.99         | 2.84         | 0.15                   |
| DMAC-BPCTPA  | 481                   | 2.92         | 2.79         | 0.13                   |
| PXZ-BPCTPA   | 517                   | 2.71         | 2.62         | 0.09                   |
| 3DPAC-BPCTPA | 474                   | 2.96         | 2.82         | 0.14                   |
| 3DMAC-BPCTPA | 488                   | 2.86         | 2.75         | 0.11                   |
| 3PXZ-BPCTPA  | 510                   | 2.77         | 2.66         | 0.10                   |

<sup>a</sup>Measured in neat film state. <sup>d</sup>Obtained from the onsets of absorption spectra in neat film. <sup>e</sup>Calculated from the onset of the fluorescence spectra in neat film at 300 K. <sup>h</sup>Obtained at 77 K in neat film. <sup>i</sup>Splitting between  $S_1$  and  $T_1$  energy.

**Table S2.** Photophysical properties of DPAC-BPCTPA, DMAC-BPCTPA and PXZ-BPCTPA in various solvents.

| Solvent           | DPAC-BPCTPA          |                     |                                  | DMAC-BPCTPA          |                     |                                  | PXZ-BPCTPA           |                     |                                  |
|-------------------|----------------------|---------------------|----------------------------------|----------------------|---------------------|----------------------------------|----------------------|---------------------|----------------------------------|
|                   | $\lambda_{abs}$ (nm) | $\lambda_{em}$ (nm) | Stokes shift (cm <sup>-1</sup> ) | $\lambda_{abs}$ (nm) | $\lambda_{em}$ (nm) | Stokes shift (cm <sup>-1</sup> ) | $\lambda_{abs}$ (nm) | $\lambda_{em}$ (nm) | Stokes shift (cm <sup>-1</sup> ) |
| Tol               | 340                  | 465                 | 7866                             | 340                  | 484                 | 8793                             | 333                  | 525                 | 10982                            |
| Et <sub>2</sub> O | 339                  | 478                 | 8621                             | 341                  | 499                 | 9321                             | 333                  | 535                 | 11338                            |
| EA                | 339                  | 499                 | 9458                             | 339                  | 518                 | 10181                            | 332                  | 567                 | 12455                            |
| THF               | 339                  | 517                 | 10193                            | 339                  | 534                 | 10755                            | 333                  | 570                 | 12455                            |
| DCM               | 342                  | 543                 | 10823                            | 343                  | 562                 | 11361                            | 333                  | 609                 | 13610                            |
| DMF               | 341                  | 548                 | 11058                            | 343                  | 577                 | 11793                            | 332                  | 620                 | 14030                            |
| $\Delta\mu$ (D)   | 17.9                 |                     |                                  | 18.8                 |                     |                                  | 19.6                 |                     |                                  |

**Table S3.** Photophysical properties of 3DPAC-BPCTPA, 3DMAC-BPCTPA and 3PXZ-BPCTPA in various solvents.

| Solvent           | 3DPAC-BPCTPA         |                     |                                  | 3DMAC-BPCTPA         |                     |                                  | 3PXZ-BPCTPA          |                     |                                  |
|-------------------|----------------------|---------------------|----------------------------------|----------------------|---------------------|----------------------------------|----------------------|---------------------|----------------------------------|
|                   | $\lambda_{abs}$ (nm) | $\lambda_{em}$ (nm) | Stokes shift (cm <sup>-1</sup> ) | $\lambda_{abs}$ (nm) | $\lambda_{em}$ (nm) | Stokes shift (cm <sup>-1</sup> ) | $\lambda_{abs}$ (nm) | $\lambda_{em}$ (nm) | Stokes shift (cm <sup>-1</sup> ) |
| Tol               | 343                  | 470                 | 7843                             | 341                  | 488                 | 8809                             | 336                  | 531                 | 10950                            |
| Et <sub>2</sub> O | 337                  | 481                 | 8889                             | 337                  | 500                 | 9672                             | 332                  | 541                 | 11681                            |
| EA                | 345                  | 512                 | 9455                             | 339                  | 519                 | 10192                            | 333                  | 570                 | 12492                            |
| THF               | 340                  | 520                 | 10188                            | 340                  | 537                 | 10796                            | 335                  | 573                 | 12421                            |
| DCM               | 345                  | 539                 | 10427                            | 346                  | 564                 | 11186                            | 334                  | 602                 | 13303                            |
| DMF               | 342                  | 550                 | 11056                            | 342                  | 575                 | 11814                            | 329                  | 613                 | 14040                            |
| $\Delta\mu$ (D)   | 21.1                 |                     |                                  | 22.7                 |                     |                                  | 23.9                 |                     |                                  |

Table S4. The calculated electronic transitions by TD-DFT of DPAC-BPCTPA, DMAC-BPCTPA and PXZ-BPCTPA.

|             | Excited state 1                              | Excited state 2                                 | Excited state 3                                 |
|-------------|----------------------------------------------|-------------------------------------------------|-------------------------------------------------|
| DPAC-BPCTPA | $\lambda=463$ nm $f=0.000$<br>HOMO->LUMO 98% | $\lambda=389$ nm $f=0.1178$<br>HOMO-1->LUMO 97% | $\lambda=358$ nm $f=0.0004$<br>HOMO-5->LUMO 68% |
| DMAC-BPCTPA | $\lambda=480$ nm $f=0.000$<br>HOMO->LUMO 98% | $\lambda=395$ nm $f=0.1336$<br>HOMO-1->LUMO 97% | $\lambda=361$ nm $f=0.0008$<br>HOMO-4->LUMO 68% |
| PXZ-BPCTPA  | $\lambda=529$ nm $f=0.000$<br>HOMO->LUMO 98% | $\lambda=401$ nm $f=0.1200$<br>HOMO-1->LUMO 97% | $\lambda=363$ nm $f=0.0039$<br>HOMO-5->LUMO 68% |

Table S5. Photophysical characteristics and kinetic parameters of these compounds in 20 wt% mCP films.

| Compound     | $\Phi_{PL}^a$<br>[%] | $\Phi_{pb}$<br>[%] | $\Phi_{db}$<br>[%] | $\tau_{pb}$<br>[ns] | $\tau_{db}$<br>[ $\mu$ s] | $k_r, s_c$<br>[ $10^6$ s $^{-1}$ ] | $k_{nr, s_c}$<br>[ $10^6$ s $^{-1}$ ] | $k_{ISC}^c$<br>[ $10^7$ s $^{-1}$ ] | $k_{RISC}^c$<br>[ $10^6$ s $^{-1}$ ] |
|--------------|----------------------|--------------------|--------------------|---------------------|---------------------------|------------------------------------|---------------------------------------|-------------------------------------|--------------------------------------|
| DPAC-BPCTPA  | 48.9                 | 13.8               | 35.1               | 26.3                | 6.2                       | 5.25                               | 5.49                                  | 2.73                                | 0.57                                 |
| DMAC-BPCTPA  | 64.6                 | 16.2               | 48.4               | 24.5                | 5.3                       | 6.61                               | 3.62                                  | 3.06                                | 0.75                                 |
| PXZ-BPCTPA   | 68.9                 | 17.3               | 51.6               | 25.2                | 4.2                       | 6.87                               | 3.10                                  | 2.97                                | 0.95                                 |
| 3DPAC-BPCTPA | 54.8                 | 8.3                | 46.5               | 14.9                | 5.2                       | 5.57                               | 4.59                                  | 5.69                                | 1.26                                 |
| 3DMAC-BPCTPA | 74.7                 | 11.2               | 63.5               | 13.2                | 5.0                       | 8.48                               | 2.87                                  | 6.44                                | 1.33                                 |
| 3PXZ-BPCTPA  | 76.3                 | 11.5               | 64.8               | 14.1                | 3.8                       | 8.16                               | 2.53                                  | 6.03                                | 1.75                                 |

<sup>a</sup>Measured in doped films (20 wt% mCP films) using integrating sphere under N<sub>2</sub>. <sup>b</sup> $\Phi_p$  and  $\Phi_d$  are the prompt fluorescence and delayed fluorescence quantum yield, respectively;  $\tau_p$  and  $\tau_d$  are the lifetimes of the prompt and delayed decay components, respectively. <sup>c</sup> $k_r, s_c$ ,  $k_{nr, s_c}$ ,  $k_{ISC}$  and  $k_{RISC}$  are the rate constant for fluorescence radiative transition, non-radiative transition, intersystem crossing (ISC) and reverse intersystem crossing (RISC) processes, respectively.

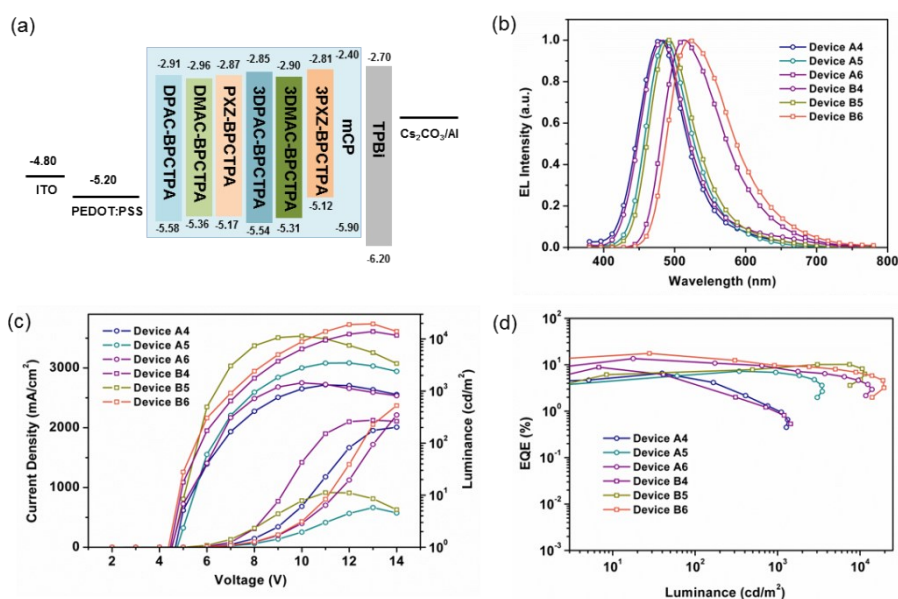

**Figure S20.** (a) Energy diagram of the materials used in doped devices; (b) normalized EL spectral; (c) current density-voltage-luminance (J-V-L) curves; (d) EQE versus luminance curves. Configurations: ITO/PEDOT:PSS (40 nm)/emitter (40 nm)/TPBi (30 nm) /Cs<sub>2</sub>CO<sub>3</sub> (2 nm)/Al (100 nm) (Device A4: emitter = DPAC-BPCTPA (20 wt%): mCP; Device A5: emitter = DMAC-BPCTPA (20 wt%): mCP; Device A6: emitter = PXZ-BPCTPA (20 wt%): mCP; Device B4: emitter = 3DPAC-BPCTPA (20 wt%): mCP; Device B5: emitter = 3DMAC-BPCTPA (20 wt%): mCP; Device 6: emitter = 3PXZ-BPCTPA (20 wt%): mCP.

**Table S6.** Electroluminescence characteristics of the doped devices.

| Device    | $\lambda_{em}^a$<br>[nm] | $V_{on}^b$<br>[V] | $CE_{max}^c$<br>[Cd A <sup>-1</sup> ] | $L_{max}^d$<br>[cd m <sup>-1</sup> ] | $EQE_{max}^e$<br>[%] | $PE_{max}^f$<br>[lm W <sup>-1</sup> ] | $CIE^g$<br>(x,y) |
|-----------|--------------------------|-------------------|---------------------------------------|--------------------------------------|----------------------|---------------------------------------|------------------|
| Device A4 | 480                      | 4.6               | 11.2                                  | 1323                                 | 6.6                  | 5.9                                   | (0.17, 0.25)     |
| Device A5 | 487                      | 4.7               | 16.7                                  | 3477                                 | 7.3                  | 7.5                                   | (0.18, 0.34)     |
| Device A6 | 514                      | 4.5               | 39.9                                  | 13964                                | 13.7                 | 25.1                                  | (0.30, 0.54)     |
| Device B4 | 483                      | 4.4               | 16.8                                  | 1441                                 | 8.7                  | 25.1                                  | (0.18, 0.27)     |
| Device B5 | 492                      | 4.4               | 23.4                                  | 11393                                | 10.2                 | 9.2                                   | (0.19, 0.38)     |
| Device B6 | 527                      | 4.3               | 52.3                                  | 19528                                | 17.6                 | 32.8                                  | (0.33, 0.55)     |

<sup>a</sup>The maximum emission recorded at 6 V. <sup>b</sup>Turn-on voltage measured at 1 cd m<sup>-2</sup>.

<sup>c</sup>CE<sub>max</sub>= maximum current efficiency. <sup>d</sup>L<sub>max</sub>= maximum luminance. <sup>e</sup>EQE<sub>max</sub>= maximum external quantum efficiency. <sup>f</sup>PE<sub>max</sub>= maximum power efficiency. <sup>g</sup>Commission International de l'Eclairage coordinates at 6 V.

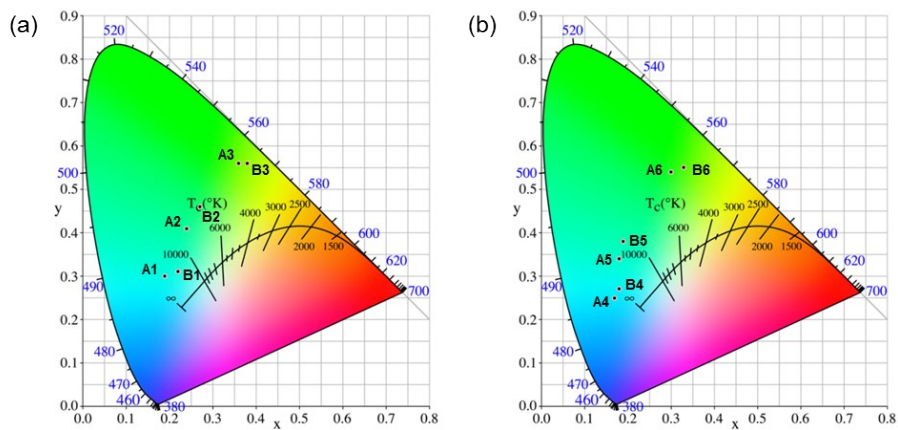

**Figure S21.** CIE diagram of the non-doped devices (a) and doped devices (b).

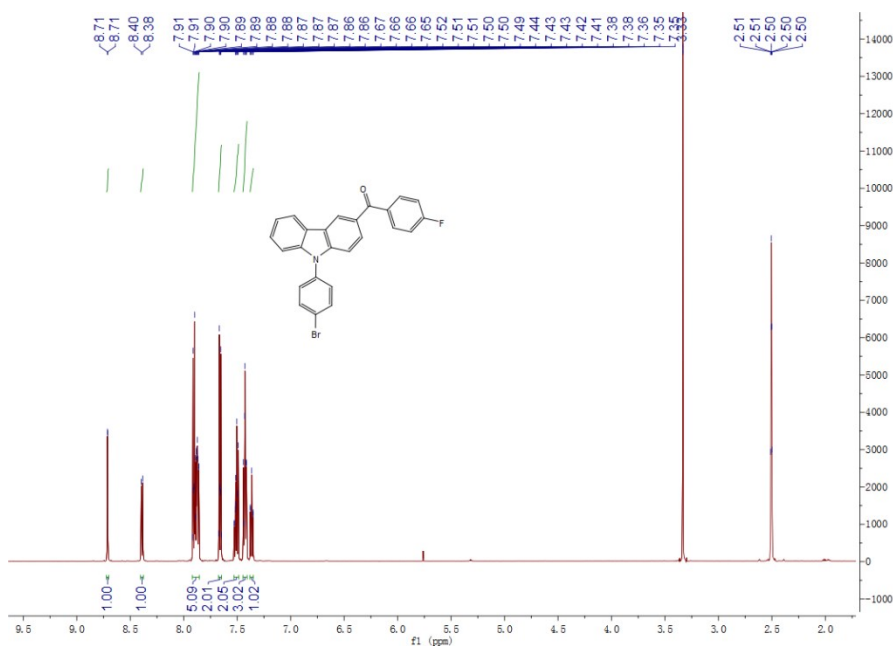

**Figure S22.** <sup>1</sup>H-NMR spectrum of 1 in DMSO-d<sub>6</sub>.



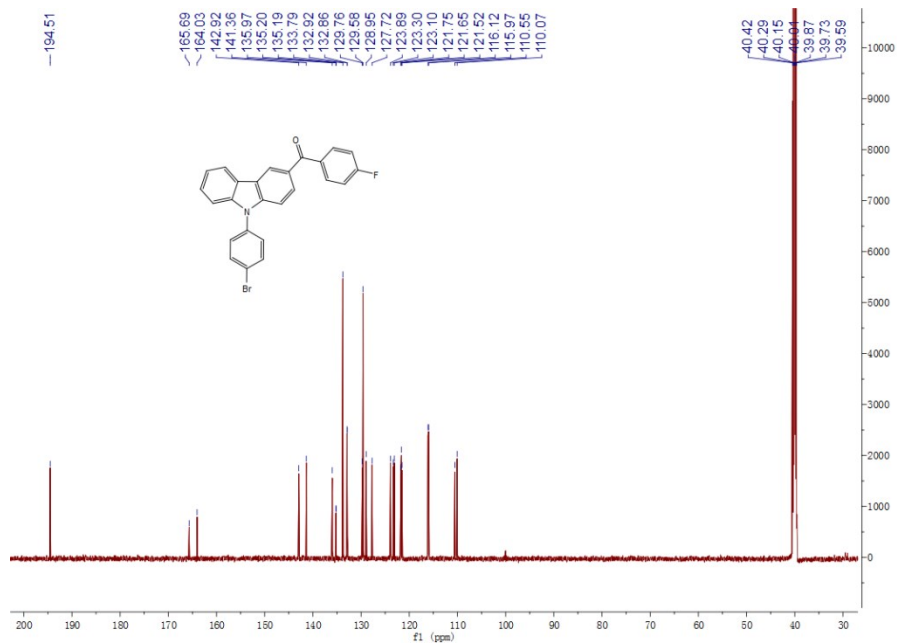

Figure S23.  $^{13}\text{C-NMR}$  spectrum of 1 in DMSO- $d_6$ .

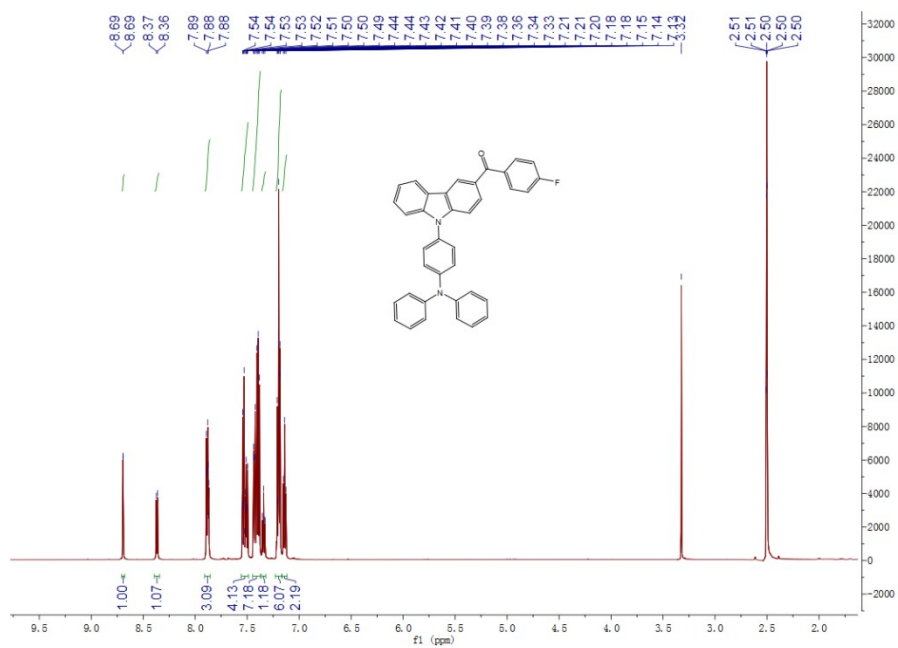

Figure S24.  $^1\text{H-NMR}$  spectrum of 2 in DMSO- $d_6$ .

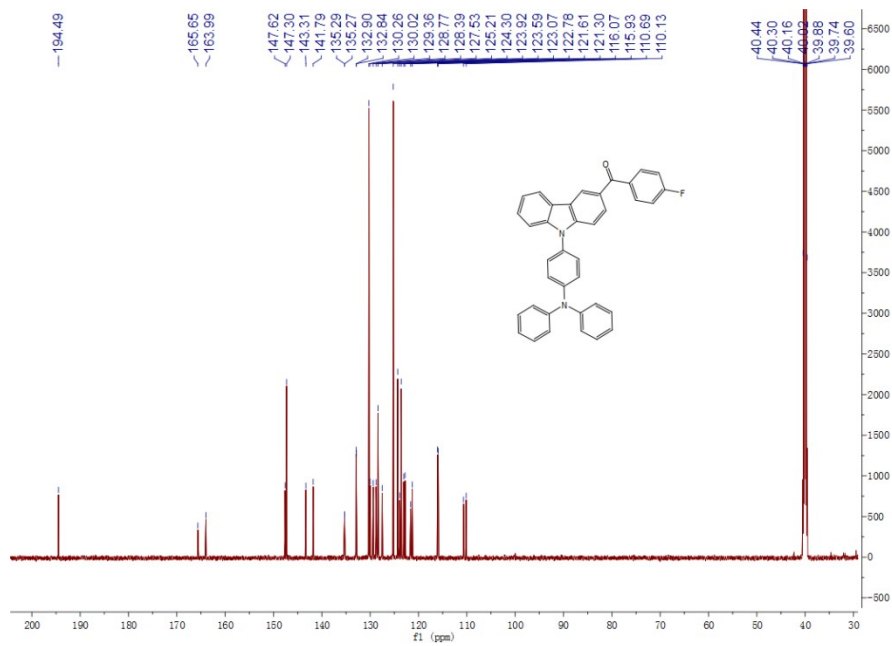

Figure S25.  $^{13}\text{C}$ -NMR spectrum of 2 in DMSO- $d_6$ .

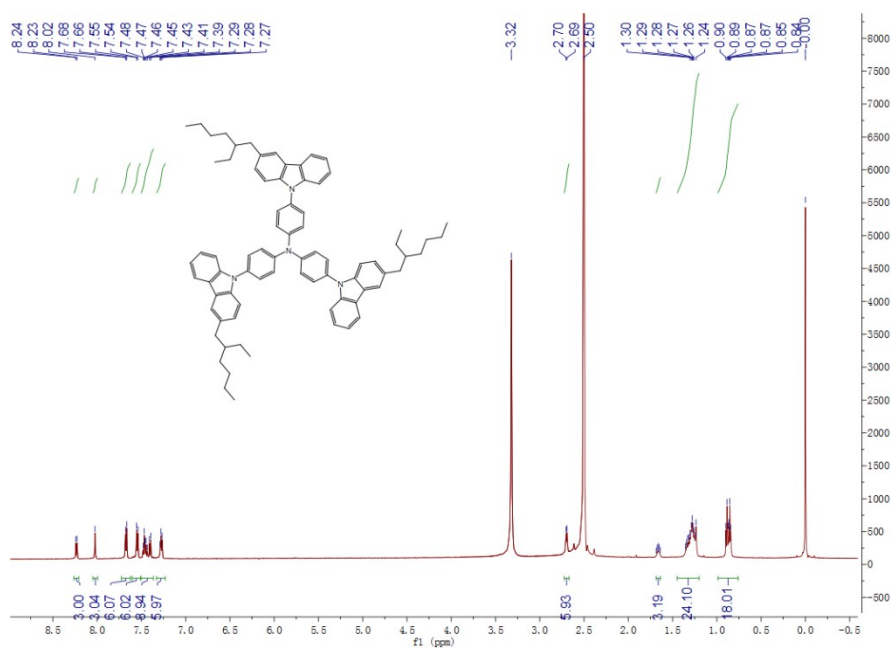

Figure S26.  $^1\text{H}$ -NMR spectrum of 3 in DMSO- $d_6$ .



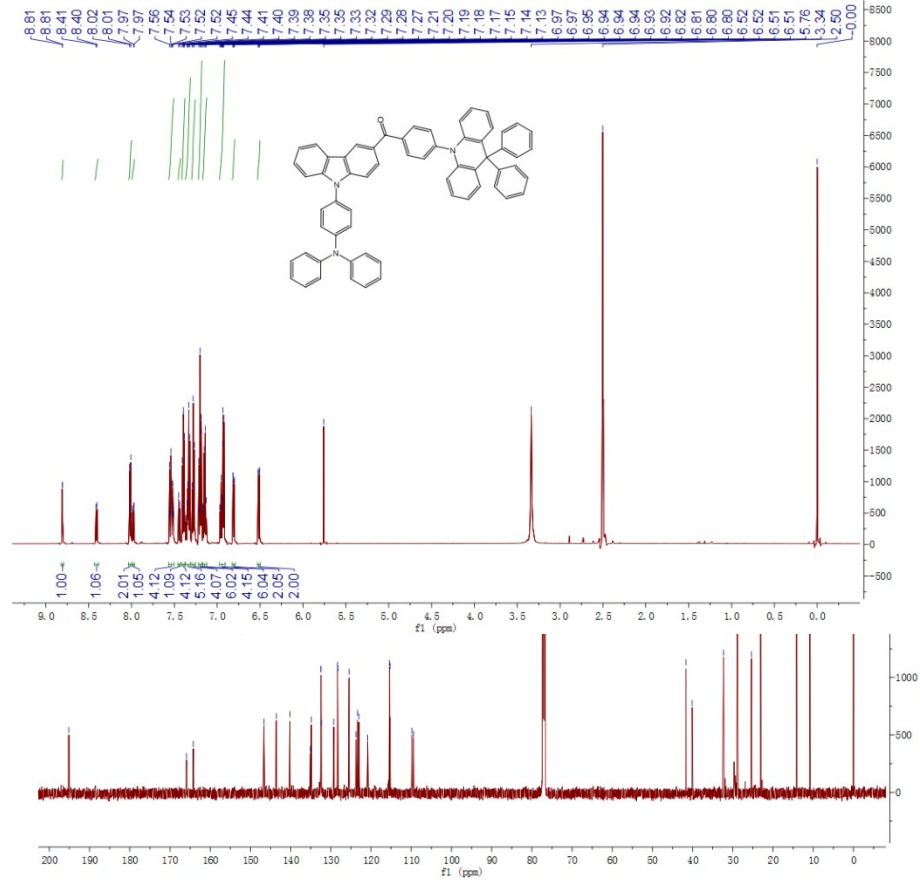

Figure S29. <sup>13</sup>C-NMR spectrum of 4 in CDCl<sub>3</sub>.

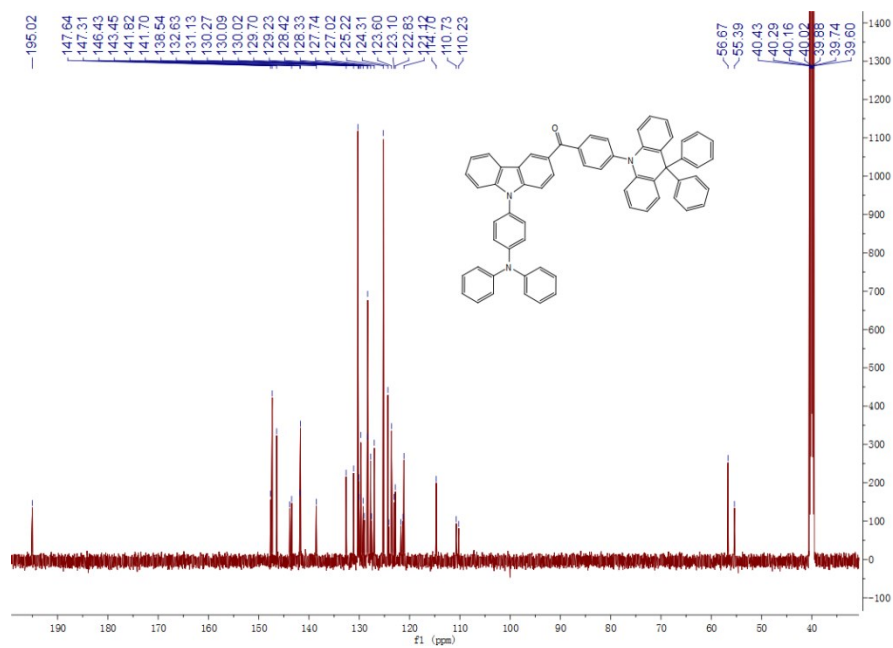

Figure S30. <sup>1</sup>H-NMR spectrum of DPAC-BPCTPA in CDCl<sub>3</sub>.

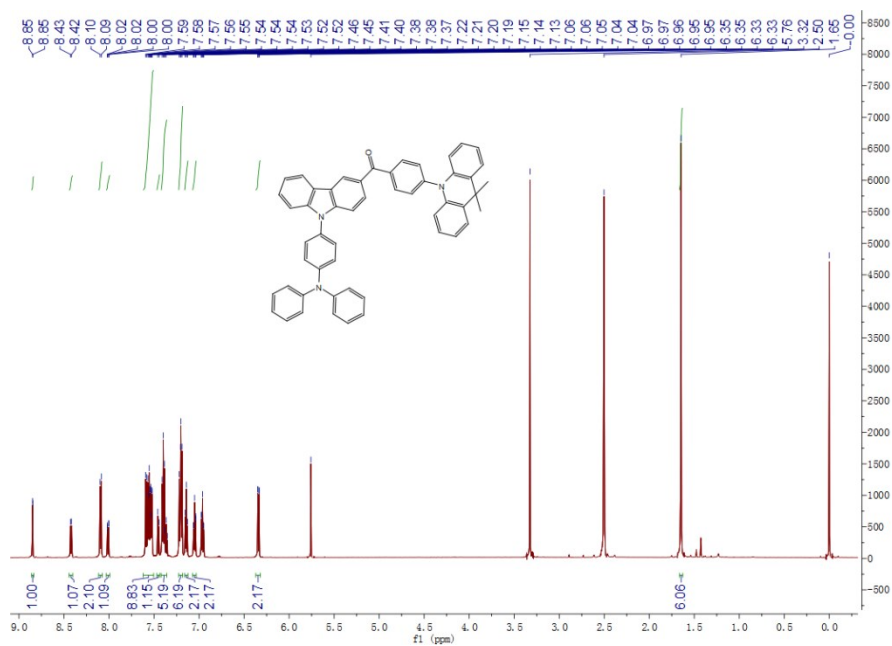

**Figure S31.**  $^{13}\text{C-NMR}$  spectrum of DPAC-BPCTPA in DMSO- $d_6$ .

**Figure S32.**  $^1\text{H-NMR}$  spectrum of DMAC-BPCTPA in DMSO- $d_6$ .

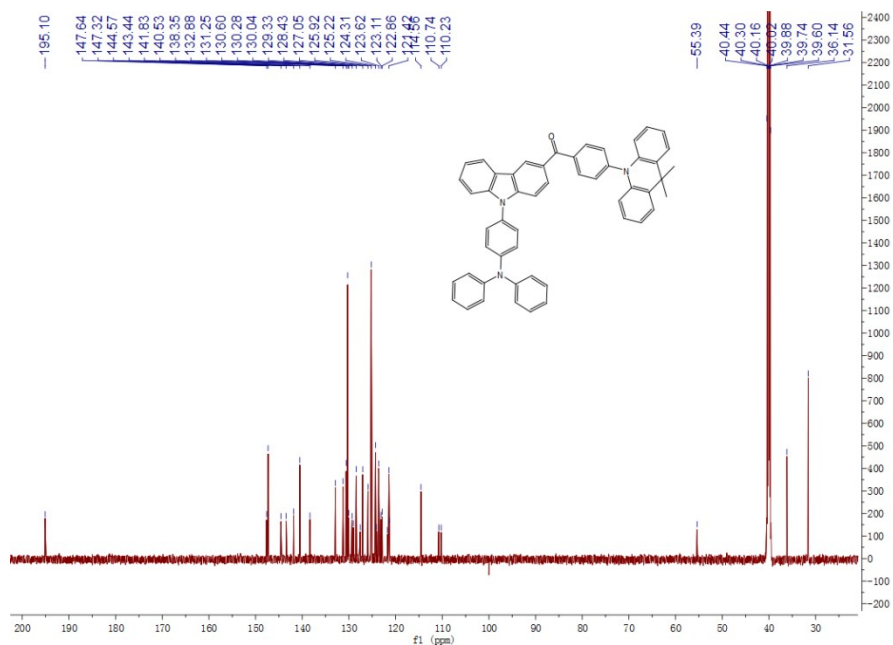

**Figure S33.** <sup>13</sup>C-NMR spectrum of DMAC-BPCTPA in DMSO-d<sub>6</sub>.

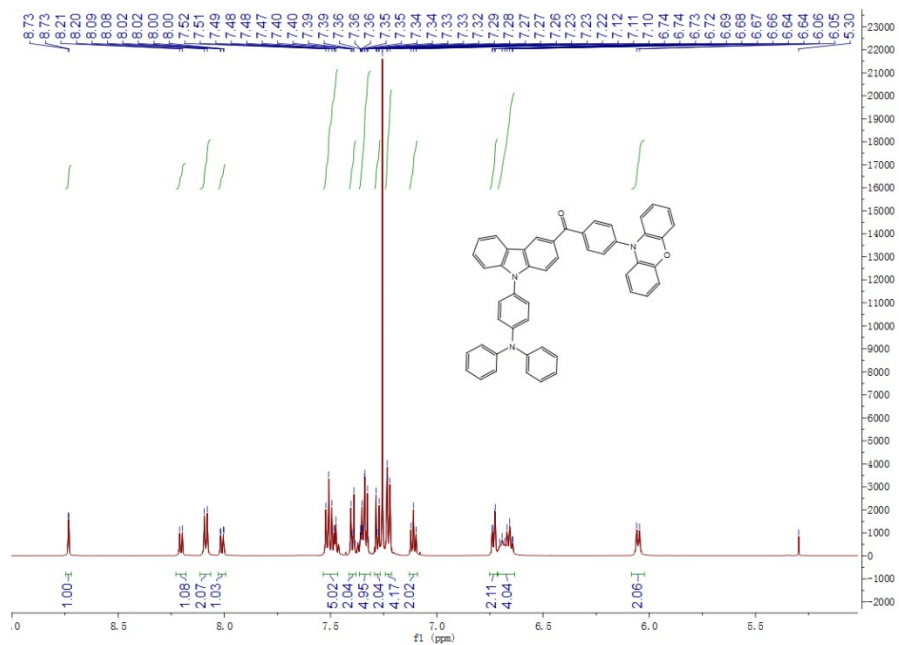

**Figure S34.** <sup>1</sup>H-NMR spectrum of PXZ-BPCTPA in CDCl<sub>3</sub>.

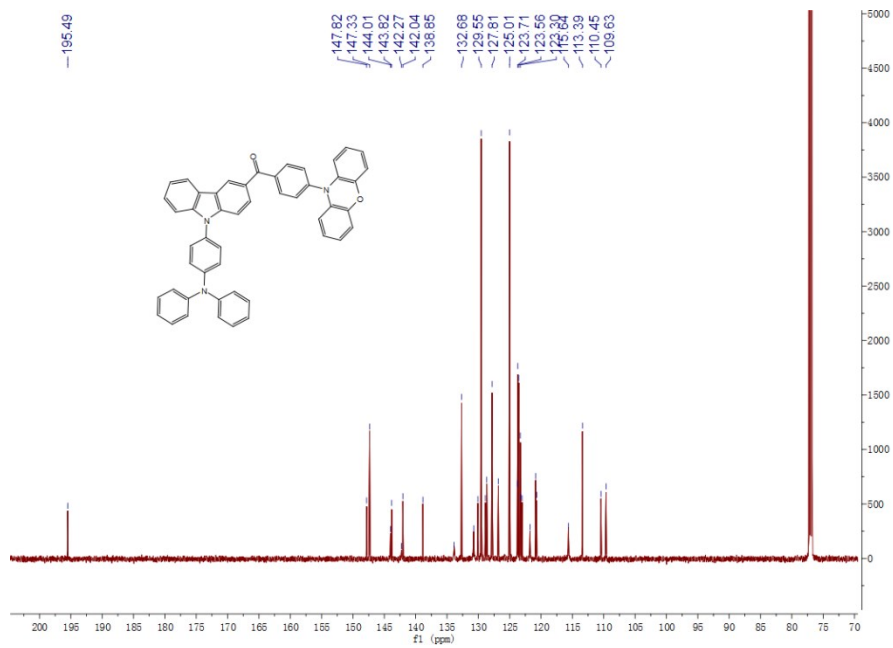

Figure S35. <sup>13</sup>C-NMR spectrum of PXZ-BPCTPA in CDCl<sub>3</sub>.

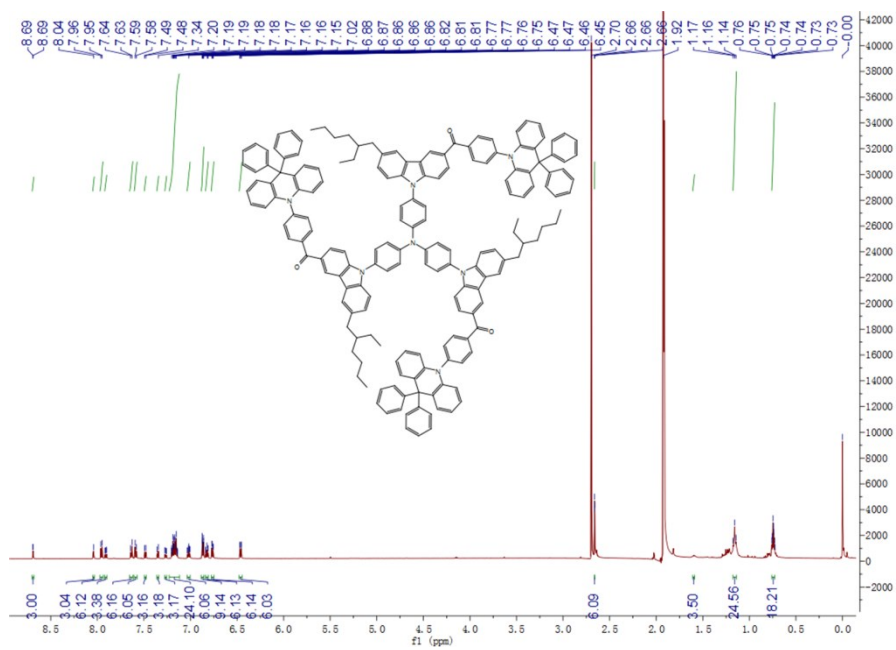

Figure S36. <sup>1</sup>H-NMR spectrum of 3DPAC-BPCTPA in Acetone-d<sub>6</sub>.

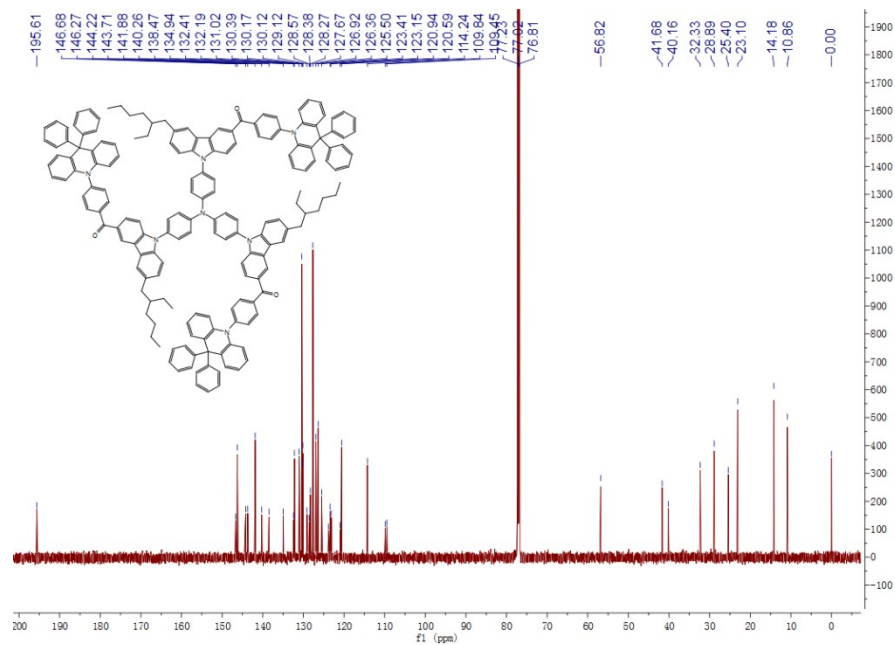

**Figure S37.**  $^{13}\text{C}$ -NMR spectrum of 3DPAC-BPCTPA in  $\text{CDCl}_3$ .

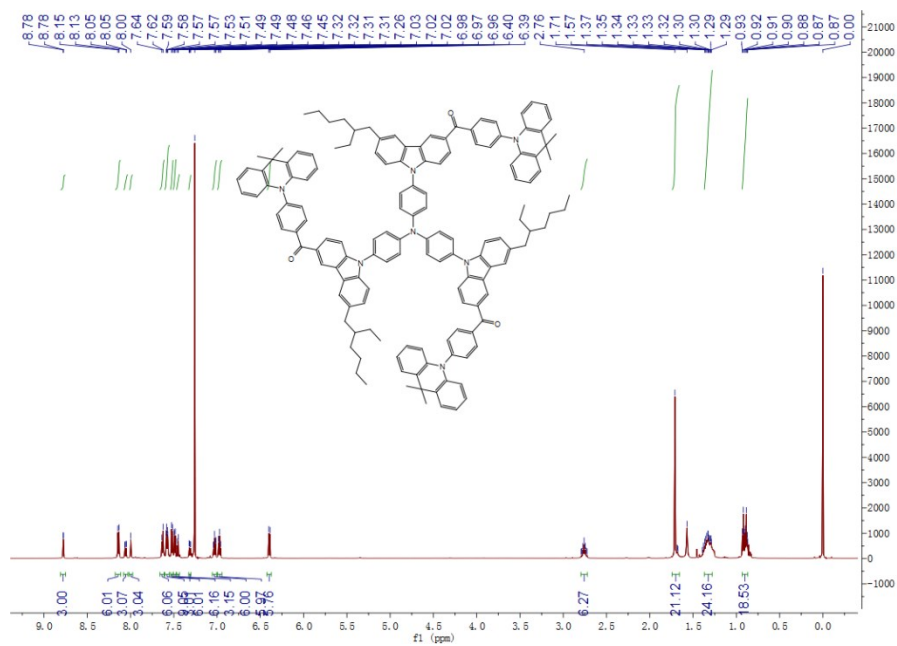

**Figure S38.**  $^1\text{H}$ -NMR spectrum of 3DMAC-BPCTPA in  $\text{CDCl}_3$ .



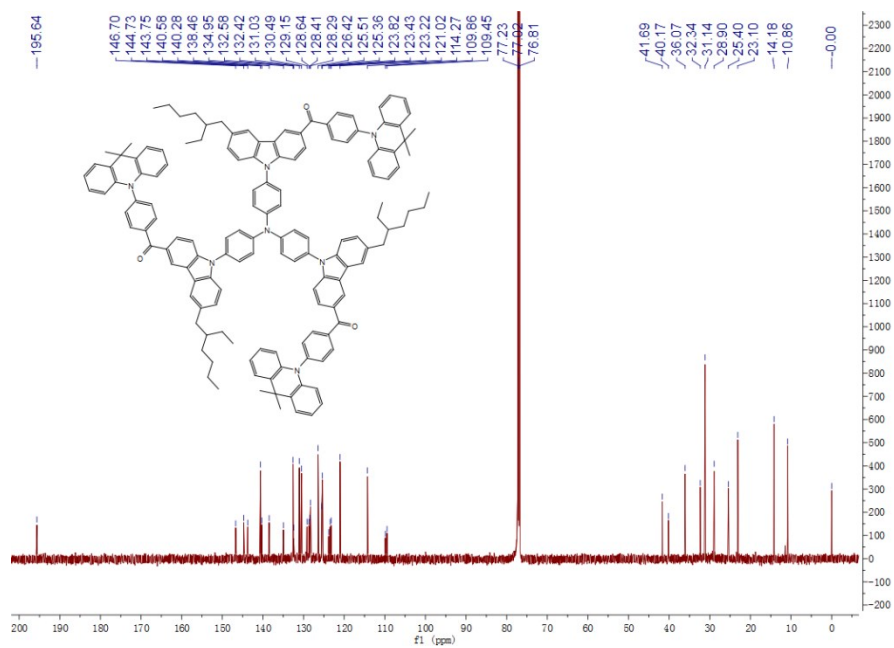

**Figure S39.**  $^{13}\text{C}$ -NMR spectrum of 3DMAC-BPCTPA in  $\text{CDCl}_3$ .

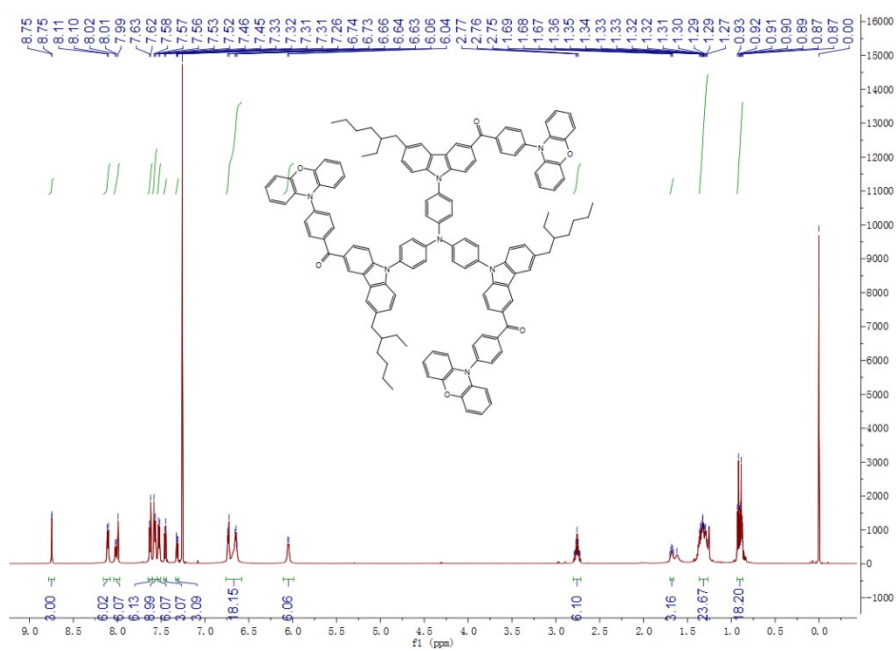

**Figure S40.**  $^1\text{H}$ -NMR spectrum of 3PXZ-BPCTPA in  $\text{CDCl}_3$ .

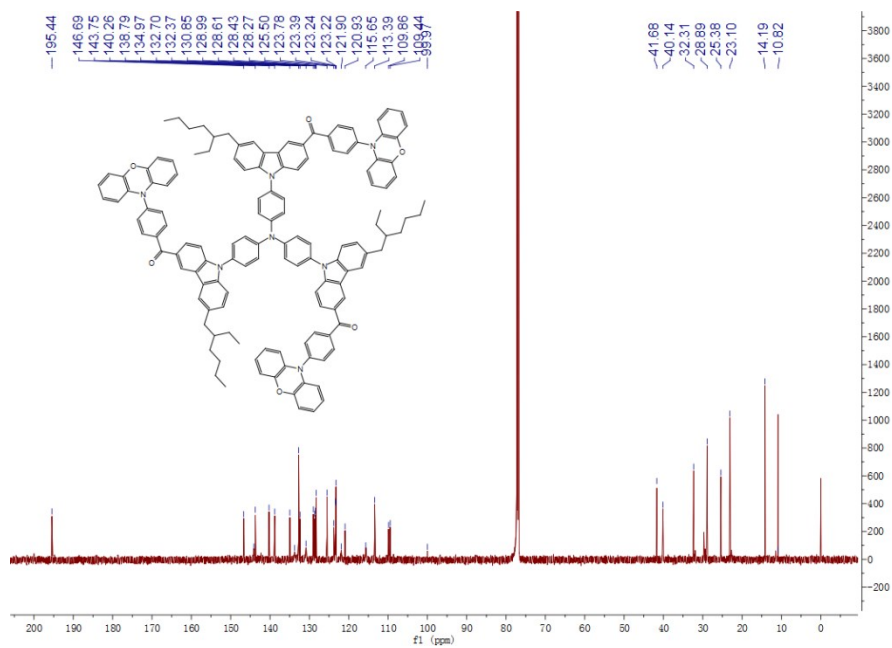

Figure S41.  $^{13}\text{C}$ -NMR spectrum of 3PXZ-BPCTPA in  $\text{CDCl}_3$ .

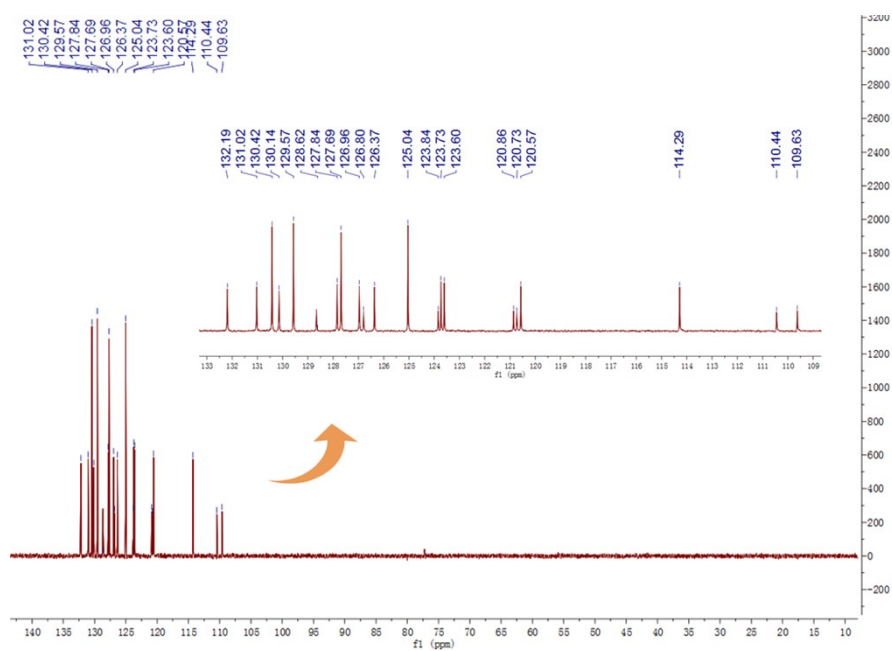

Figure S42. DEPT- $135^\circ$  spectrum of DPAC-BPCTPA in  $\text{CDCl}_3$ .

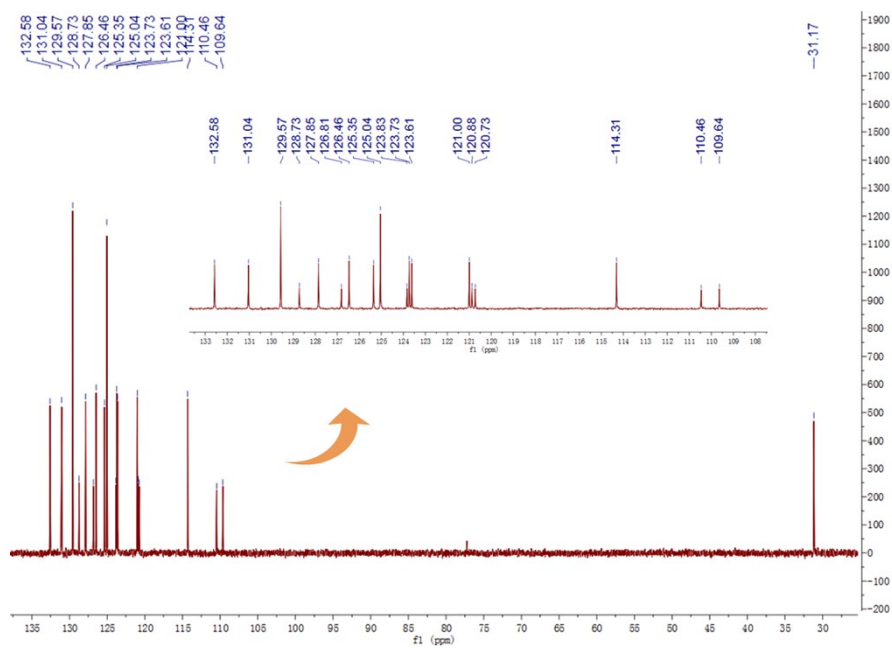

Figure S43. DEPT-135° spectrum of DMAC-BPCTPA in CDCl<sub>3</sub>.

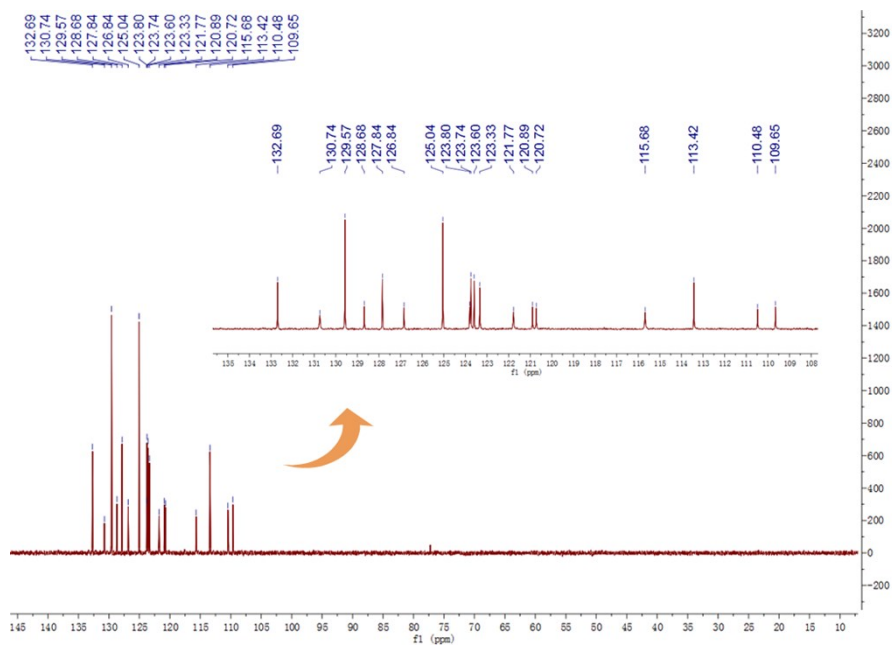

Figure S44. DEPT-135° spectrum of PXZ-BPCTPA in CDCl<sub>3</sub>.

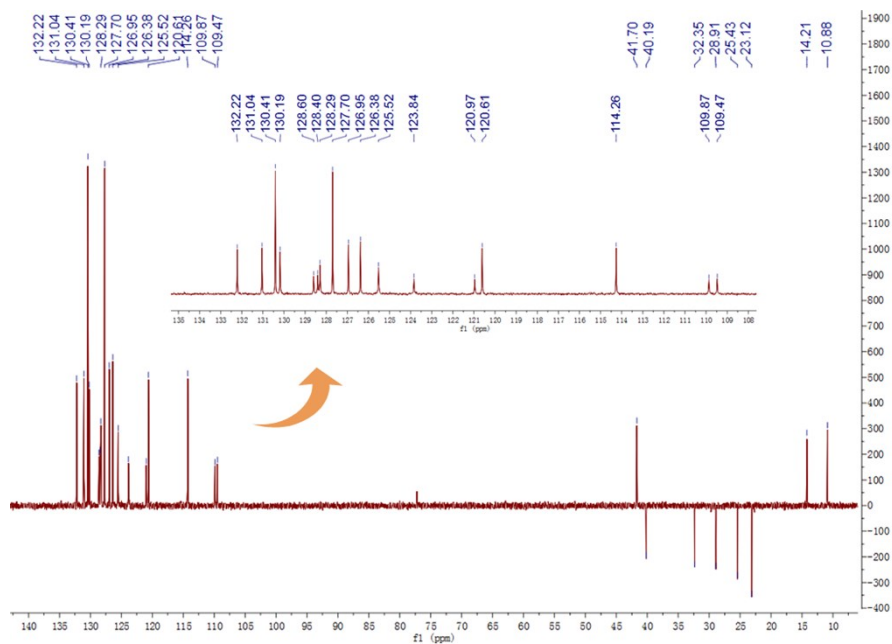

Figure S45. DEPT-135° spectrum of 3DPAC-BPCTPA in CDCl<sub>3</sub>.

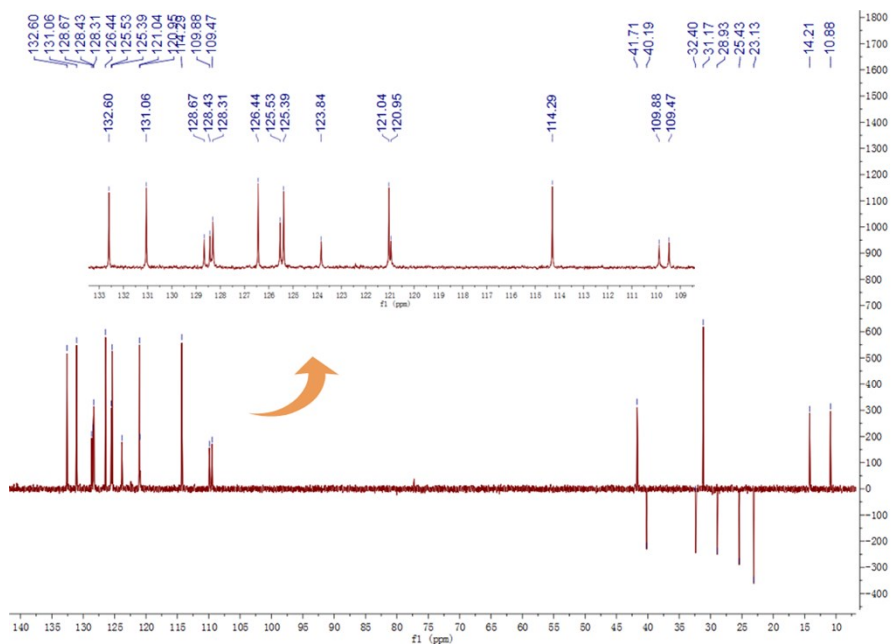

Figure S46. DEPT-135° spectrum of 3DMAC-BPCTPA in CDCl<sub>3</sub>.

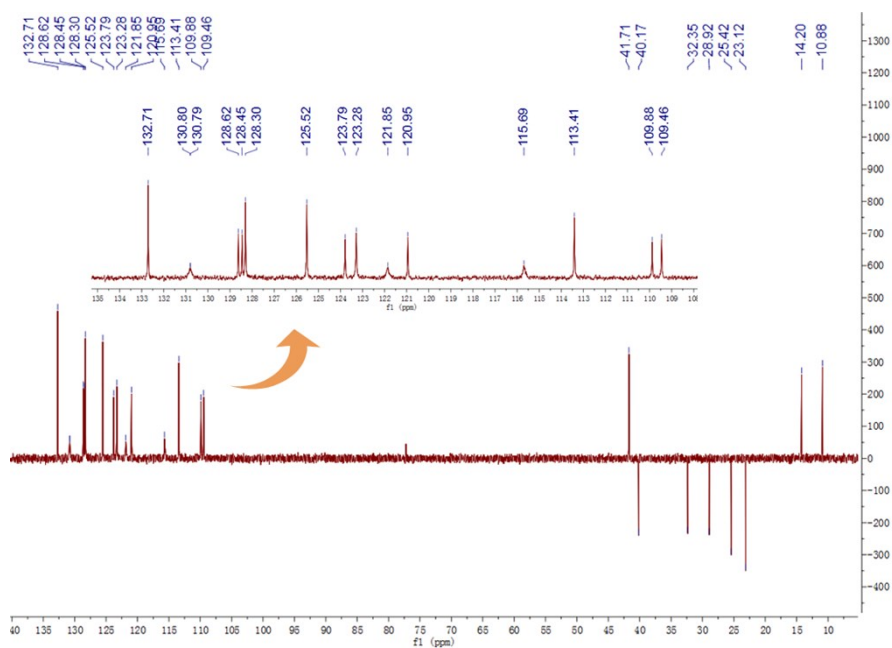

Figure S47. DEPT-135° spectrum of 3PXZ-BPCTPA in CDCl<sub>3</sub>.

(1) Liu, H.; Zeng, J.; Guo, J.; Nie, H.; Zhao, Z.; Tang, B. Z. High-Performance Non-doped OLEDs with Nearly 100 % Exciton Use and Negligible Efficiency Roll-Off. *Angew. Chem., Int. Ed.* **2018**, *57*, 9290-9294.

(2) Chen, S.; Zeng, P.; Wang, W.; Wang, X.; Wu, Y.; Lin, P.; Peng, Z. Naphthalimide–Arylamine Derivatives with Aggregation Induced Delayed Fluorescence for Realizing Efficient Green to Red Electroluminescence. *J. Mater. Chem. C* **2019**, *7*, 2886-2897.
